# Supplementary material
Source: PubMed Central journal article supplement (PMC9165723)
Supplement: NIHMS1757501-supplement-1757501_Sup_Info.pdf [file NIHMS1757501-supplement-1757501_Sup_Info.pdf]

1 **Regulation of aged skeletal muscle regeneration by circulating extracellular**  
 2 **vesicles**

3  
 4 Amrita Sahu<sup>1,2</sup>, Zachary J. Clemens<sup>2</sup>, Sunita N. Shinde<sup>1</sup>, Sruthi Sivakumar<sup>1,3</sup>, Abish Pius<sup>1,4</sup>,  
 5 Ankit Bhatia<sup>5</sup>, Silvia Picciolini<sup>6</sup>, Cristiano Carlomagno<sup>6</sup>, Alice Gualerzi<sup>6</sup>, Marzia Bedoni<sup>6</sup>,  
 6 Bennett Van Houten<sup>7</sup>, Mita Lovalekar<sup>8</sup>, Nicholas F. Fitz<sup>2</sup>, Iliya Lefterov<sup>2</sup>, Aaron Barchowsky<sup>2,7</sup>,  
 7 Radosveta Koldamova<sup>2</sup>, \*Fabrisia Ambrosio<sup>1,2,3,9</sup>

8  
 9 \*Corresponding author

10

11 **SUPPLEMENTARY FIGURES**

12

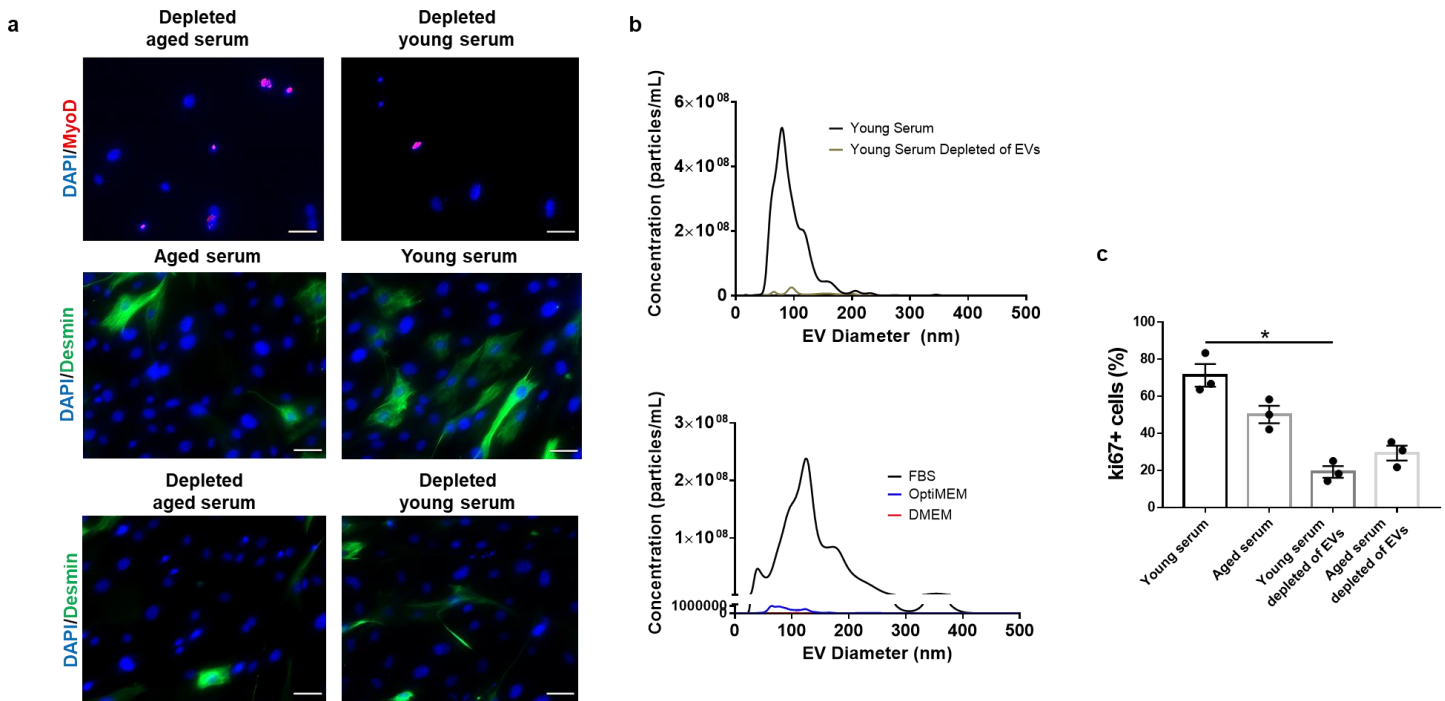

13

14 **Supplementary Figure 1. Effect of EV depletion on myogenicity and cellular proliferation. a,**  
 15 **Representative images of MyoD and Desmin expression in aged MPCs when treated with aged or young**  
 16 **serum depleted of EVs. Scale: 50  $\mu$ m. b, NTA plot of young serum vs. EV-depleted young serum (left)**  
 17 **and fetal bovine serum (FBS), and FBS-free media (OptiMEM) and DMEM (right). c, Quantification of**  
 18 **ki67+(%) aged MPCs in response to young serum, aged serum, or EV-depleted young or aged serum**  
 19 **(\*p<0.05, one-way ANOVA with Tukey's comparison, n=3 wells/group). Data presented as mean +**  
 20 **SEM.**

21

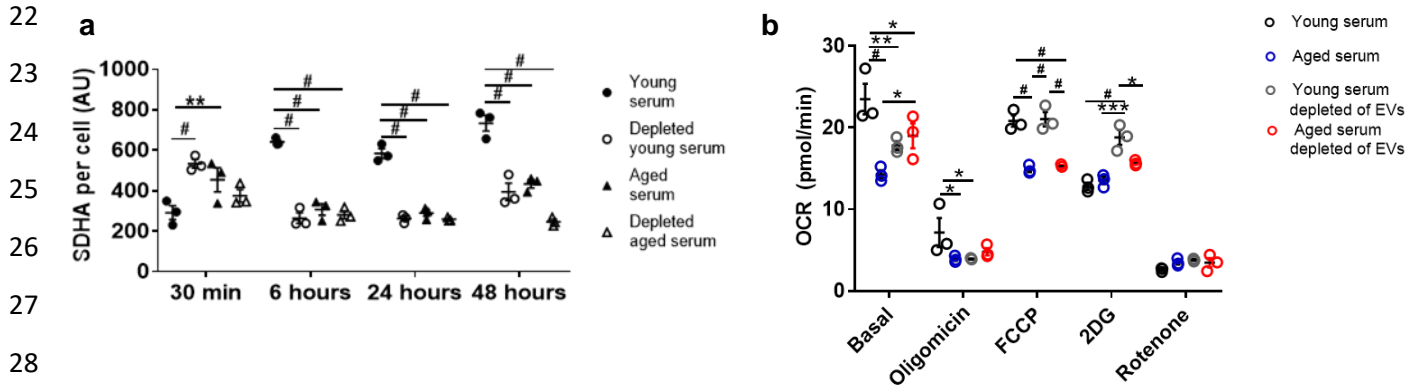

**Supplemental Figure 2. Serum treatment increased target cell mitochondrial health in an age- and EV-dependent manner** **a**, Quantification of SDHA in aged MPCs receiving serum treatments with or without EVs at timepoints: 30 minutes, 6 hours, 24 hours, and 48 hours. (\*\* $p < 0.01$ , # $p < 0.0001$ , two-way ANOVA with Dunn's multiple comparisons to young serum as control). **b**, Fibro-adipogenic progenitor cells (FAPs) were exposed to young or aged serum with/without EVs for 48 hours, and bioenergetics was assessed using Seahorse XFe96 analyzer. Eight wells were evaluated for bioenergetics per cell type and treatment group. Oxygen Consumption Rate (OCR) is represented as the average of the three time points for Basal, Oligomycin treatment, FCCP treatment, 2DG treatment and Rotenone treatment  $\pm$ SEM (8 wells/group, data points represent  $n=3$  time points, \* $p \leq 0.05$ , \*\* $p < 0.01$ , \*\*\* $p < 0.001$ , # $p < 0.0001$ ; two-way ANOVA with repeated measures and Tukey's multiple comparisons). Data presented as mean + SEM.

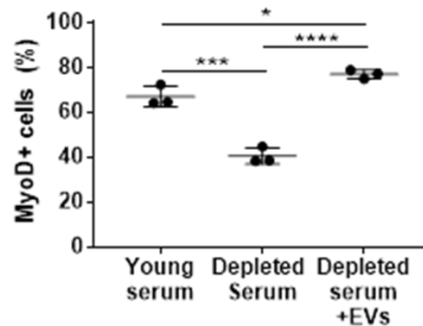

**Supplemental Figure 3. Cells treated with young serum depleted of EVs display decreased MyoD expression, but the effect is reversed when serum is replenished with isolated EVs.** Removal of EVs from young serum significantly reduced the MyoD expression of aged myogenic progenitor cells. However, supplementation of the EV-depleted serum with purified column-derived EVs enhanced MyoD expression of target muscle cells. (\* $p < 0.05$ , \*\*\* $p < 0.001$ , \*\*\*\* $p < 0.0001$ ,  $n=3$  wells/group, one-way ANOVA with Tukey's multiple comparison). Data presented as mean + SEM.

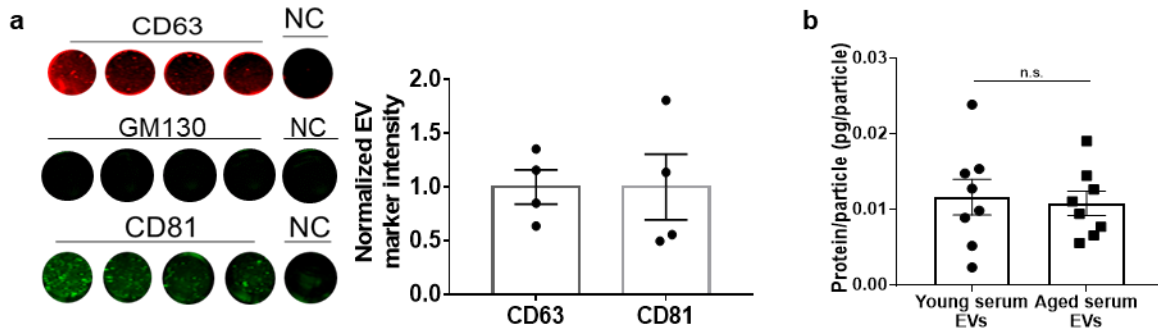

50  
51  
52  
53  
54  
55  
56  
57  
58  
59  
60

**Supplemental Figure 4. Characterization and protein quantification of circulating EVs in young and aged serum.** **a**, In-well immunofluorescence western analysis of young serum EVs reveals the presence of EV surface markers, CD63 and CD81, and absence of cytosolic contaminant protein, GM130. CD63 and CD81 intensity scores were divided by final EV concentrations in the wells and normalized to average intensity of surface markers of young serum EVs. (NC=negative control). **b**, Bicinchoninic acid assay was used to quantify the protein content per EV ( $p>0.05$ , two-tailed Student's t test with Welch's correction). Data presented as mean + SEM.

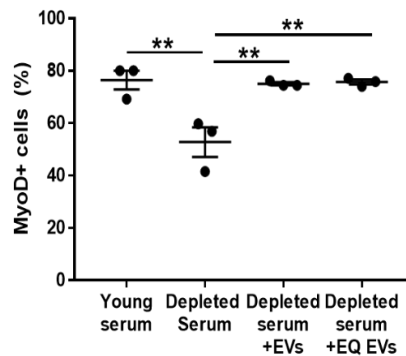

61  
62  
63  
64  
65  
66  
67  
68  
69  
70  
71

**Supplemental Figure 5. The decreased MyoD expression in cells treated with young EV-depleted serum is restored when serum is repleted with either isolated EVs (Depleted serum+ EVs) or Exoquick elute (Depleted serum+EQ EVs).** Removal of EVs from young serum significantly reduced the MyoD expression of aged myogenic progenitor cells. However, supplementation of the EV-depleted serum with purified column-derived EVs or Exo-quick precipitated EVs equally enhanced MyoD expression of target muscle cells. (\*\* $p<0.01$ ,  $n=3$  wells/group, one-way ANOVA with Tukey's multiple comparison). Data presented as mean + SEM.

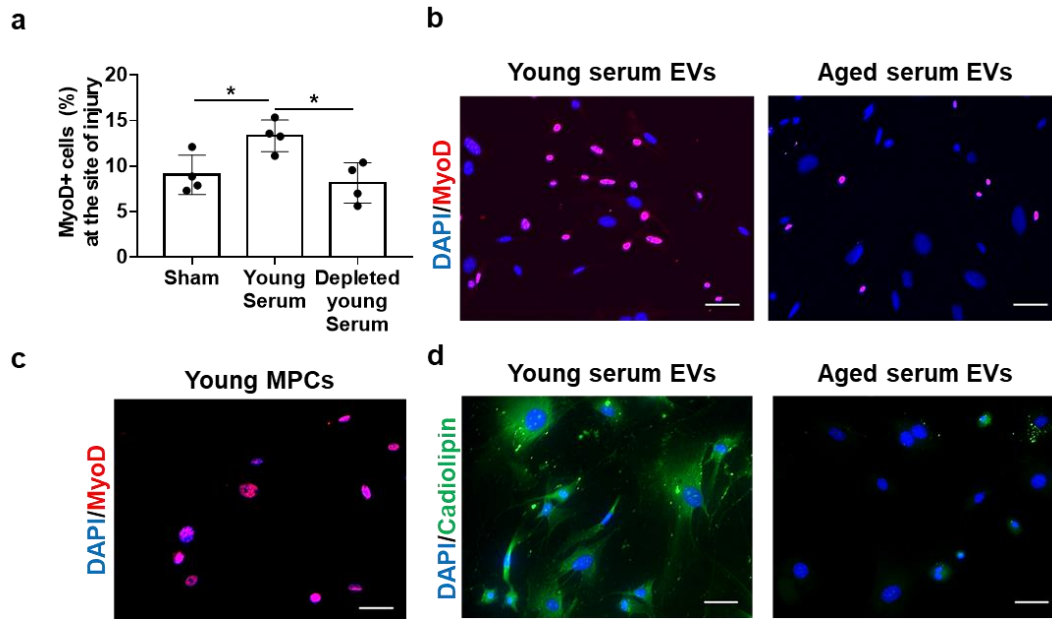

72

73 **Supplemental Figure 6. MyoD expression and cardiolipin content in aged muscle cells is increased**  
 74 **in the presence of young serum in an EV-dependent manner.** **a**, Quantification of MyoD *in vivo* three  
 75 days post injury in aged animals receiving sham, young serum, or EV-depleted young serum treatment.  
 76 (\* $p < 0.05$ , one-way ANOVA with Tukey's multiple comparisons,  $n = 4/\text{group}$ ). **b**, Representative images  
 77 of MyoD in aged MPCs treated with young or aged serum EVs. Scale: 50  $\mu\text{m}$ . **c**, Representative image of  
 78 MyoD in Young MPCs. Scale: 50  $\mu\text{m}$ . **d**, Representative images of cardiolipin content in aged MPCs  
 79 treated with young or aged serum EVs. Scale: 50  $\mu\text{m}$ . Data presented as mean + SEM.

80

81

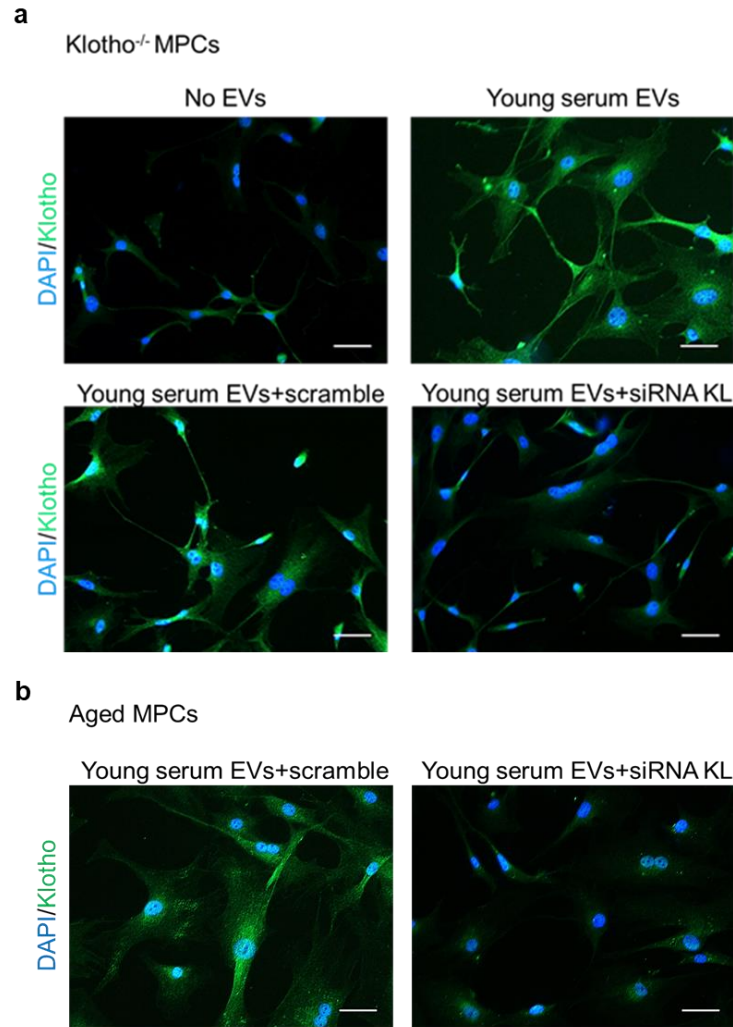

82

83 **Supplemental Figure 7.** Representative images of Klotho protein in *Klotho*<sup>-/-</sup> MPCs or aged MPCs  
 84 administered with young serum EVs treated with a non-targeting RNA (scramble) or silencing RNA  
 85 (siRNA) to *Klotho*. Scale: 50 μm.

86

87

88

89

90

91

92

93

94

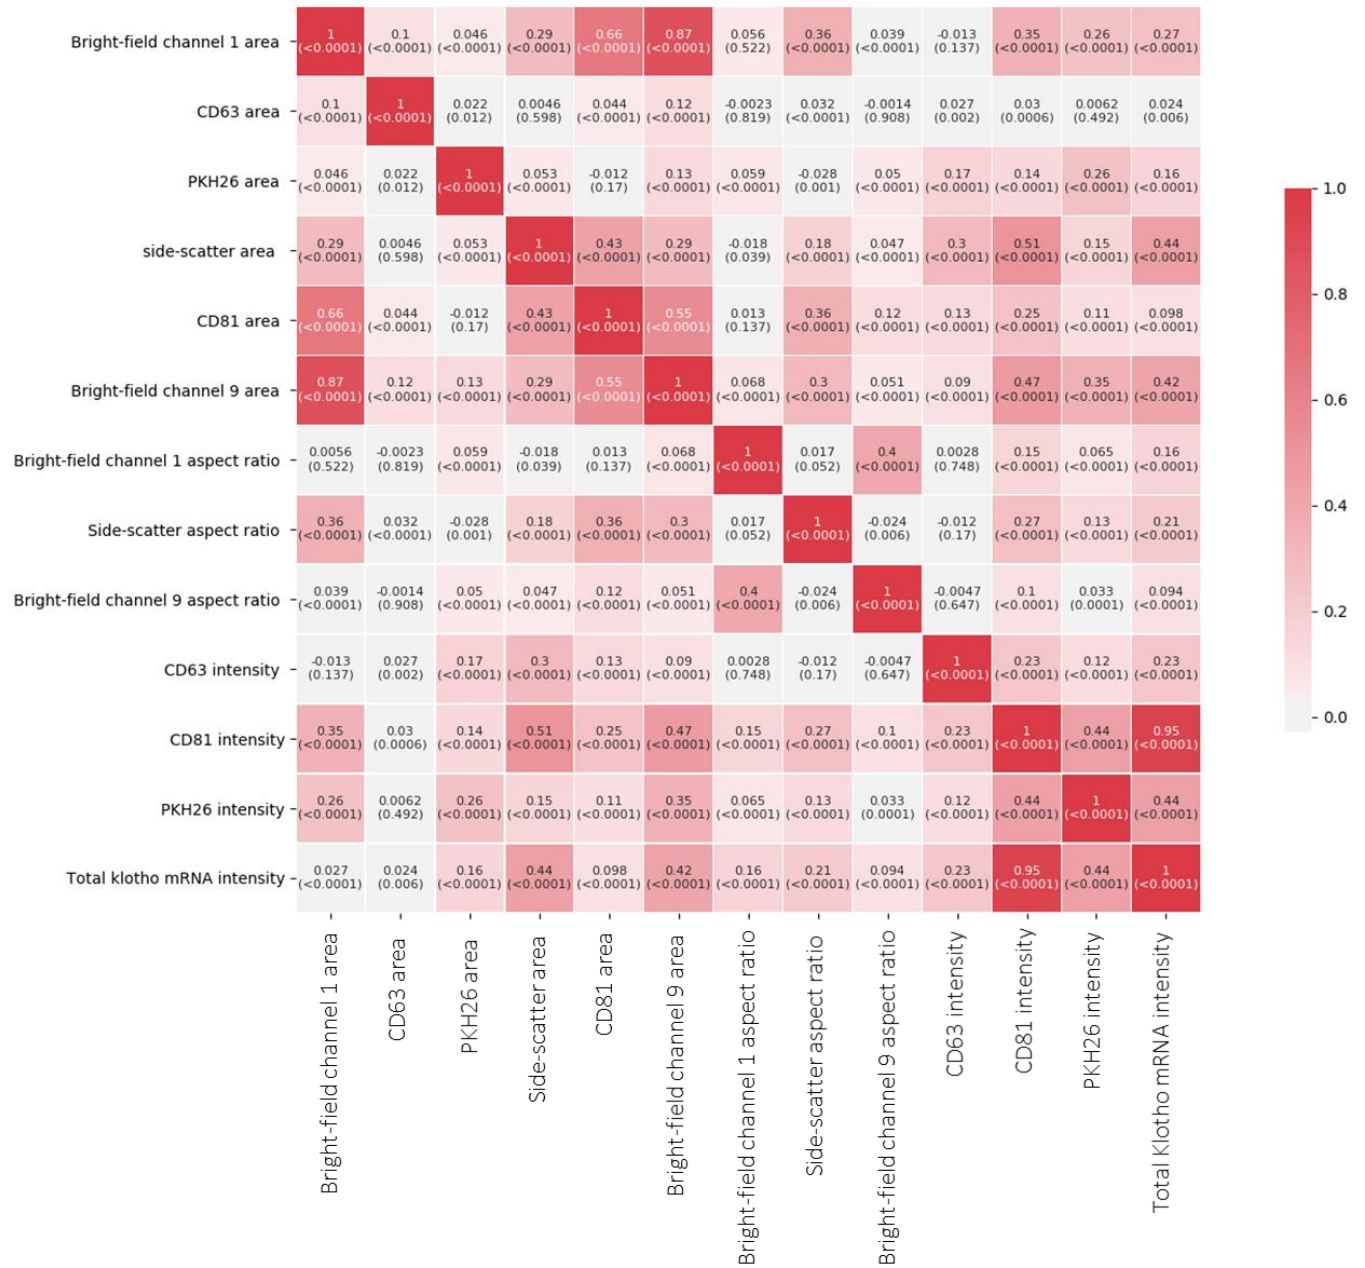

96  
97  
98  
99  
100  
101  
102

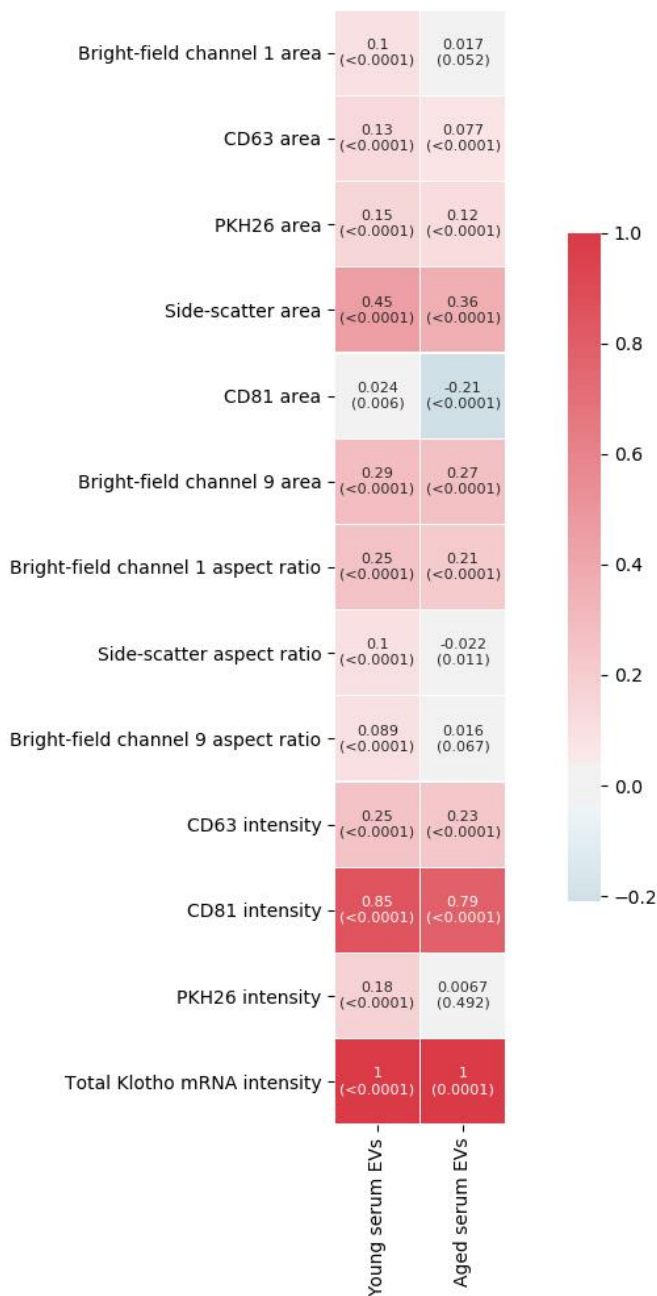

104

105 **Supplemental Figure 8. Correlation matrices of EV structural and compositional features.** (A)  
 106 Pearson r coefficients were evaluated for correlation between features extracted from the dataset. Size  
 107 (area and aspect ratio) and texture (modulation) features were extracted from the ImageStream image-  
 108 files using IDEAS software. Modulation in the context of fluorescent images refers to dispersion or  
 109 accumulation of the tagged protein of interest within the region of interest. The intensity feature was  
 110 evaluated using classical computer vision-based image processing. (B) Pearson r coefficients were  
 111 evaluated for correlation of Klotho mRNA intensity with size and intensity features of bright-field, side-  
 112 scatter, PKH26, CD63, and CD81 channels. Size (area and aspect ratio) features were extracted from the

113 ImageStream image-files using IDEAS software. The intensity feature was evaluated using classical  
114 computer vision-based image processing. From the filtered dataset of 13,206 total particles, 130 particles  
115 that satisfied the criteria of total klotho<15 and cd81>150, were eliminated for correlation matrix as they  
116 were observed to be in the noise range when plotted. The p-values for each correlation is indicated in  
117 brackets below the Pearson r coefficients.

118

119

120

121

122

123

124

125

126

127

128



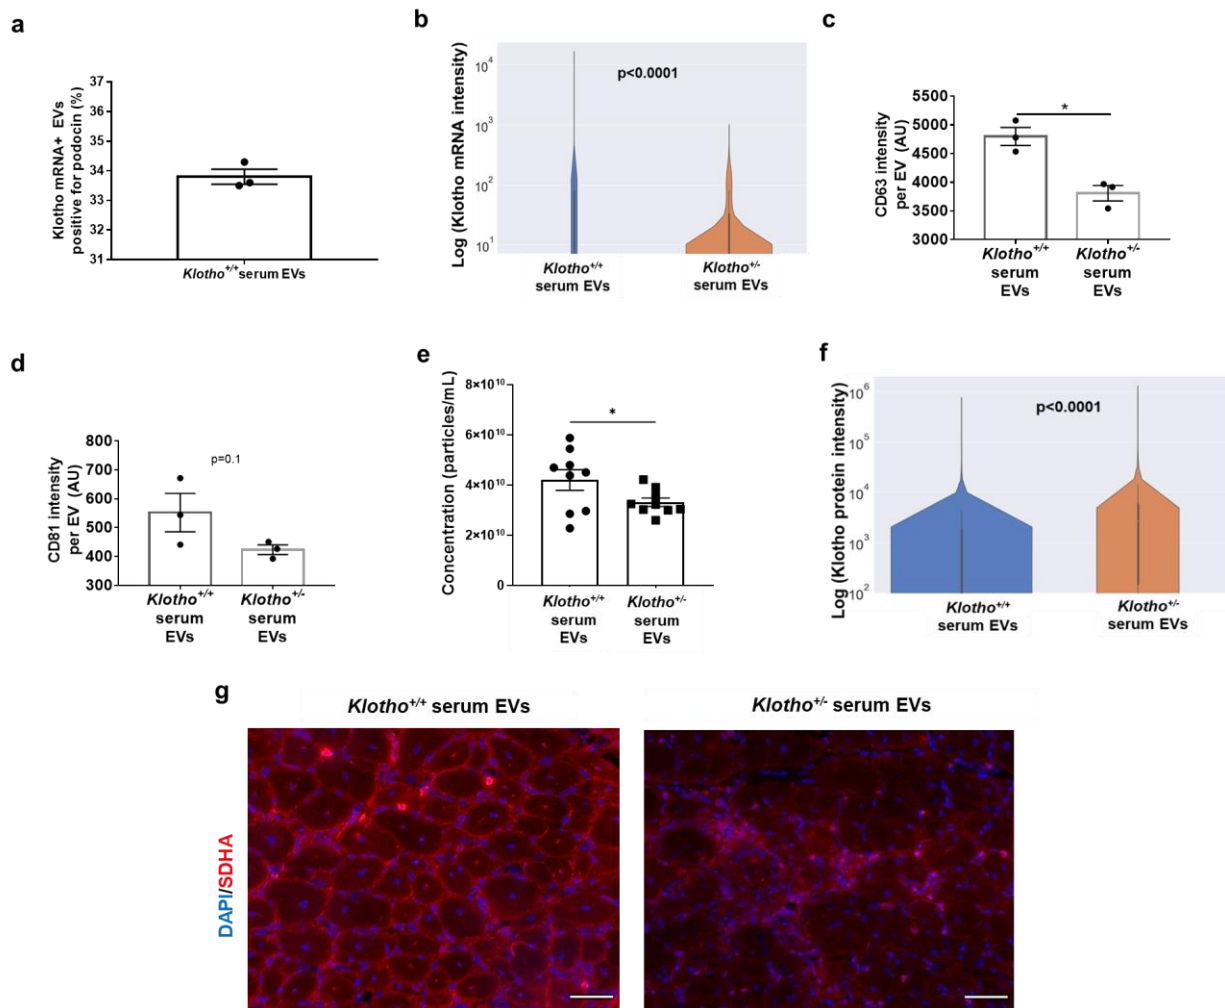

129

130 **Supplemental Figure 9. Administration of EVs from  $Klotho^{+/-}$  animals ultimately regulates *in vivo***  
 131 **muscle SDHA expression, a small portion of which express kidney marker, podocin. a,**  
 132 Quantification of the number of Klotho mRNA positive EVs that are positive for kidney marker, podocin  
 133 (%), as determined by imaging flow cytometry. **b**, Violin plots of Klotho mRNA intensity values per EV,  
 134 extracted using imaging flow cytometry analysis of EVs ( $p < 0.0001$ ,  $n = 19,992$  ( $Klotho^{+/+}$ ), 38,524  
 135 ( $Klotho^{+/-}$ ) EVs for this experimental run were pooled from 4 young or 4 aged serum samples; Mann  
 136 Whitney t test, experiment repeated in triplicates). Violin plot minima, maxima, median, 25<sup>th</sup> percentile  
 137 and 75<sup>th</sup> percentile are 0, 16530.5, 0, 0, 78.8 for  $Klotho^{+/+}$  EVs and 0, 991.2, 0, 0, and 32.6 for  $Klotho^{+/-}$   
 138 EVs. Quantification of **c**, CD63 and **d**, CD81 content per EV in the circulation of  $Klotho^{+/+}$  or  $Klotho^{+/-}$   
 139 animals ( $p > 0.05$ ,  $n = 3$ /group, two-tailed Mann Whitney t test). **e**, Quantification of EV concentration in  
 140 circulation of  $Klotho^{+/+}$  or  $Klotho^{+/-}$  animals ( $p > 0.05$ ,  $n = 9$ /group, two-tailed Welch's t test). **f**, Violin plots  
 141 of Klotho protein intensity values extracted using imaging flow cytometry analysis of EVs ( $p < 0.0001$ ,  
 142  $n = 19,992$  ( $Klotho^{+/+}$ ), 38,577 ( $Klotho^{+/-}$ ) EVs for this experimental run, pooled from 4 young or 4 aged  
 143 serum samples, two-tailed Mann Whitney t test, experiment repeated in triplicates). Violin plot minima,  
 144 maxima, median, 25<sup>th</sup> percentile and 75<sup>th</sup> percentile are 0, 765296.2, 95.4, 0, and 1797.4 for  $Klotho^{+/+}$  EVs  
 145 and 0, 1310203.4, 2715.4, 152.1, and 5759.9 for  $Klotho^{+/-}$  EVs. **g**, Representative images of SDHA content  
 146 in injured aged muscles 14dpi, treated with EVs isolated from  $Klotho^{+/+}$  or  $Klotho^{+/-}$  serum. Scale: 50  
 147  $\mu$ m. Data presented as mean + SEM.

148  
149  
150  
151  
152  
153  
154  
155  
156

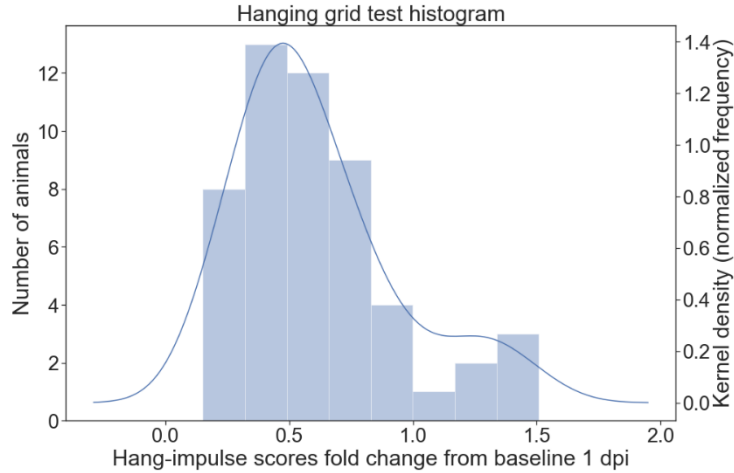

157 **Supplemental Figure 10. Histogram and kernel density plot for overall muscle endurance of aged**  
 158 **animals one day post injury.** Variability in the overall muscle endurance as determined by the hanging  
 159 grid test as observed at one-day post injury (1 dpi) when normalized to baseline, pre-injury scores. Only  
 160 animals performing within 25-75% percentile of the median (range:0.40-0.74) were included in the study.

161  
162  
163  
164  
165  
166  
167

| Study accession | Number of samples | Sample type | Isolation method                            | RNA isolation                   | Age           | Sex           |
|-----------------|-------------------|-------------|---------------------------------------------|---------------------------------|---------------|---------------|
| GSE100206       | 32                | plasma      | Total exosome isolation kit from Invitrogen | exoRNeasy Serum/Plasma Maxi kit | Not collected | Not specified |

168

169 **Supplemental Table 1. Table outlining sample demographic information and methods**  
 170 **summary of publicly archived RNAseq data used for quantification of Klotho transcripts**  
 171 **within circulating EVs.** The Klotho transcript values shown in Figure 3I were obtained from  
 172 [www.exorbase.org](http://www.exorbase.org).

173  
174

## 175 SUPPLEMENTARY METHODS

### 176 *Animal experimentation*

177 All animal experiments were performed with prior approval from the Institutional Animal  
178 Care and Use Committee of the University of Pittsburgh (IACUC protocol # 20087744,  
179 20098045). Aged male C57BL/6 mice used in these studies were obtained from NIA (21-24  
180 months). Young male C57/BL6 mice were obtained from Jackson Laboratories. The original  
181 breeders for Klotho strain mice were obtained from MMRCC, UC Davis. The mouse colony for  
182 the laboratory was maintained in house. *Klotho* homozygotes (3-6 months, *Klotho*<sup>+/+</sup>, B6; 129S5-  
183 *Kltm1-Lex*), *Klotho* heterozygotes (3-6 months, *Klotho*<sup>+/-</sup>; B6; 129S5-*Kltm1-Lex*), young, and  
184 aged male mice were used to obtain EVs from serum. *Klotho* knockout (4-6 weeks, *Klotho*<sup>-/-</sup>; B6;  
185 129S5-*Kltm1-Lex*), young, and aged male mice were used to isolate muscle progenitor cells  
186 (MPCs).

187

### 188 *Muscle progenitor cell (MPC) isolation*

189 Muscle progenitor cells were isolated as previously described<sup>1</sup>. Briefly, hindlimb muscles  
190 were harvested and minced, after which time the tissue homogenate was weighed and treated  
191 with successive digestive enzymes. The homogenate was digested in 2 mg/mL of collagenase XI  
192 for one hour, followed by 2.4 U/mL dispase for 45 minutes and 0.1% trypsin for 30 minutes. The  
193 final homogenate was then centrifuged at 500 g for 5 minutes at 8°C, after which time the final  
194 pellet was re-suspended in high serum medium (Dulbecco's modified eagle's medium, 20% fetal  
195 bovine serum, 1% penicillin/streptomycin and 0.5% chick embryo extract). The suspension was  
196 then plated in collagen I-coated plates for 24 hours, after which time the supernatant was  
197 transferred to another collagen coated plate. For *in vitro* experiments, MPCs were freshly  
198 isolated and were not used beyond two passages. Expression levels of Pax7 and MyoD in  
199 isolated MPCs were confirmed to be 82% and 97%, respectively.

200

### 201 *Fibro-adipogenic progenitor isolation*

202 Hindlimb muscles were isolated from aged mice and were washed in HBSS to remove any  
203 hair, debris or blot clots. Muscles were chopped in wash media (HBSS+10% horse  
204 serum+1% pen/strep) until the suspension could pass through a 10 mL pipette. The muscle  
205 suspension was transferred into a 50 mL tube and centrifuged at 900g, 8°C for five minutes. The

206 muscles went through a successive digestion process of 750U/mL collagenase II (1.5 hours-step  
207 1), 11 U/mL dispase and 1000 U/mL collagenase II (both together for 45 minutes-step 2). A  
208 modified flow cytometry protocol was applied to isolate FAPs<sup>2</sup>. Cells were sorted as CD31<sup>-</sup>  
209 (Fisher Scientific, cat#50-951-7), CD45<sup>-</sup> (Invitrogen, cat# 11-0451-82), Sca1<sup>+</sup>(Invitrogen,  
210 cat#25-5981-82) and  $\alpha$ -7 integrin<sup>-</sup> (Invitrogen, cat# MA5-23555) population and grown in high  
211 serum media (Dulbecco's modified eagle's medium, 20% fetal bovine serum, 1%  
212 penicillin/streptomycin and 0.5% chick embryo extract).

213

#### 214 *Serum collection*

215 Blood was extracted from animals placed in supine position using the cardiac puncture  
216 method. Briefly, animals were anesthetized using isofluorane. Then, the skin was cut from the  
217 abdomen to the neck. The diaphragm was cut open for easy access to the apex of the heart. A  
218 pair of mosquito scissors were used to pull open the chest cavity. Blood was then drawn from the  
219 apex of the heart using a 25 5/8 gauge 1 mL needle. To avoid hemolysis due to shear stress,  
220 blood was then placed into a 1.5mL Eppendorf tube after removing the needle from the syringe.  
221 Blood was centrifuged for 20 minutes at 16,100 g after incubation at room temperature for 60  
222 minutes. The serum was then aliquoted into 1.5 mL centrifuge tubes (Eppendorf) using a 200  $\mu$ L  
223 micro-pipette and were preserved in the -20°C freezer for subsequent use. Any samples  
224 displaying hemolysis (as evidenced by significant pink/red coloration) were not included in the  
225 experiment.

226

#### 227 *Administration of serum on cells*

228 Aged MPCs were plated at a density of 8,000 or 10,000 cells per well in an 8-well chamber  
229 slide or at 60,000 cells per well in a 6-well plate. Fibro-adipogenic progenitors (FAPs) were  
230 plated at a density of 60,000 cells per well in a 6-well plate. Cells were cultured for 24 hours and  
231 then treated with 10% young or aged serum in FBS-free media (optiMEM) with or without EVs  
232 for 48 hours prior to performing any end-point analysis.

233

#### 234 *Depletion of EVs from serum*

235 Bulk EVs were depleted from young and aged serum using ExoQuick (Product# EXOQ5A-  
236 1) following the manufacturer's recommended protocol. Briefly, 63  $\mu$ L of Exoquick solution was

237 added to 250  $\mu$ L serum and the mixture was incubated on ice for 30 minutes. Next, samples were  
238 centrifuged at 1500 g for 30 minutes at 4C. The EVs were pelleted at the bottom of the tube and  
239 the EV-free serum was used for *in vitro* applications. Exoquick removed >95% EVs from the  
240 blood serum (Supplemental Fig. 2).

241

### 242 ***Analysis of bioenergetics***

243 Muscle progenitors or FAPs were first cultured for 24 hours on 6-well plates at a density of  
244 60,000 cells per well, after which time they were treated with young serum, aged serum, or EV-  
245 depleted young or aged serum. The cells were trypsinized 48 hours after treatment and plated on  
246 a 96-well plate at a density of 30,000 cells per well using CellTak. The cells were then cultured  
247 in un-buffered DMEM for 1 hour at 37°C without CO<sub>2</sub>. Cells were exposed to stressors with  
248 successive injections of 1  $\mu$ M Oligomycin, 300 nM FCCP (Carbonyl cyanide-4-  
249 (trifluoromethoxy)phenylhydrazine), 100 mM 2-DG (2-Deoxy-D-glucose) and 1  $\mu$ M Rotenone.  
250 The average of the first three time points prior to oligomycin treatment were averaged to get the  
251 basal oxygen consumption rate (OCR). Each experiment was repeated at least in triplicates. The  
252 investigator performing the seahorse experiments was blinded to the hypotheses at the time of  
253 data analysis.

254

### 255 ***Serum injections***

256 Wild-type aged male C57/BL6 (21-23 months, NIA) were randomized into one of three  
257 cohorts that received tail-vein injections of 100  $\mu$ L of young serum, 100  $\mu$ L of young serum  
258 depleted of EVs, or sham injections. For studies of muscle function, animals were injected every  
259 three days for a total of eight injections. Animals were injured with 10  $\mu$ L of 1 mg/mL of  
260 cardiotoxin on Day 12 of the experimental paradigm and muscle function was evaluated on Day  
261 23. For cognition studies, animals received a total of ten injections, and cognitive tests were  
262 administered at the end of the ninth and tenth injection.

263 We tested four serum samples randomly for platelet contamination using a hemoanalyzer  
264 (Hemvet 950FS, University of Pittsburgh Vascular Medicine Institute) and observed minimal-to-  
265 no presence of platelets in the samples (average of 5K/ $\mu$ L serum).

266

267

268 ***EV isolation using size exclusion chromatography (SEC)***

269 EVs were isolated using iZon qEVsingle 35 nm or 70 nm size-exclusion chromatography  
270 columns (Product Code: SP6). Columns were first allowed to equilibrate to room temperature  
271 prior to use. Blood serum samples were thawed at room temperature, and centrifuged at 1,500 g  
272 for 10 minutes, to remove any remaining cellular debris. After equilibrating the column to room  
273 temperature, the cap and stopper were removed, and the column was washed with 1 mL of PBS  
274 (Sigma: P5368). After washing, 100  $\mu$ L of serum was added onto the top filter of the column.  
275 The eluted volume was collected in small Eppendorf centrifuge tubes. The first five fractions  
276 (200  $\mu$ L each) were collected in a 1.5 mL tube. These fractions contain minimal amount of EVs  
277 and are considered to be void fractions according to manufacturer's guidelines. Majority of the  
278 EVs were eluted in fractions 6-11 (200  $\mu$ L each). These fractions, a total of 1.2 mL, were  
279 collected together in a 2 mL tube. After isolation, EVs were stored at 4°C for up to one week.  
280 Any unused EVs were then frozen and stored at -20°C for future use.

281 EVs were characterized for different surface markers (CD63 and CD81) using imaging flow  
282 cytometry (Fig. 3), surface plasmon resonance imaging (Fig. 5), and in-well  
283 immunofluorescence westerns (Supplemental Fig. 4).

284

285 ***Nanoparticle Tracking Analysis of EVs***

286 Nanoparticle Tracking Analysis (NTA) was performed using an NS300 NanoSight device  
287 (Malvern Panalytical). Ten microliters from each EV sample was diluted 1:100 in type 1 EV-free  
288 water and infused through the flow-cell using a syringe pump (Harvard Apparatus 98-4730).  
289 Three 45-second videos were recorded for each sample, with the camera level set to 14. These  
290 videos were batch analyzed by the software (NTA 3.3) with the detection threshold set to 3. The  
291 flow-cell was washed with 1 mL of type 1 water between each sample.

292

293 ***Repletion of EVs in EV-depleted serum***

294 EVs were depleted from 100  $\mu$ L young serum as described above. From the same mouse,  
295 another aliquot of 100  $\mu$ L young serum, EVs were isolated using size-exclusion chromatography,  
296 as described above. The eluted EVs that were collected in 1.2 mL solution were subjected to  
297 concentrating columns to concentrate the particles into a volume of 50  $\mu$ L (Product number:  
298 UFC801008D, Millipore Sigma). The eluted samples were added to the 15 mL column and

299 centrifuged at 7,500 g for 10-20 minutes until the desired volume was attained. The concentrated  
300 EVs were then added to the EV-depleted serum for downstream *in vitro* and *in vivo* studies.

301 To deplete EVs from 100  $\mu$ L serum, 25.2  $\mu$ L of Exoquick solution was added and the  
302 mixture was placed on ice for 30 minutes in a 1.5 mL Eppendorf tube. Next, the mixture was  
303 centrifuged at 1500 g for 30 minutes at 4C. The EVs were precipitated at the bottom, and the  
304 supernatant was placed into another 1.5 mL Eppendorf tube. Another 100  $\mu$ L aliquot from the  
305 same lot of serum was used to isolate EVs using size-exclusion chromatography. 100  $\mu$ L serum  
306 yielded  $\sim 2 \times 10^{10}$  EVs/mL in 1.2 mL eluted PBS solution. These EVs were then concentrated  
307 into 50  $\mu$ L solution using the method described above. This volume was then added to the 100  
308  $\mu$ L EV-depleted serum. Cells were treated cultured in 10% EV-depleted serum or EV-restored  
309 serum conditions.

310

### 311 ***EV tracking in vivo***

312 EVs were depleted from 100  $\mu$ L young serum as described above. From the same batch and  
313 another aliquot of 100  $\mu$ L young serum, EVs were isolated using size-exclusion chromatography,  
314 as described above. The eluted EVs were then stained with 1  $\mu$ L PKH26 dye (P9691, Sigma) and  
315 2  $\mu$ L of near-IR dye (EXOGV900A-1, System Biosciences) for one hour. EVs were then  
316 concentrated to 50  $\mu$ L using the concentrating columns, as described above. The dyed EVs were  
317 then added to the EV-depleted serum, which was injected via tail vein three days after  
318 administering a cardiotoxin injury to one of the TAs of aged mice (contralateral TA uninjured).  
319 The mice were euthanized 48 hours after the injection. TAs were isolated and imaged on the  
320 LiCOR Odyssey Clx system in the near-IR (800 nm) channel. TAs were subsequently harvested  
321 and frozen in nitrogen-cooled 2-methylbutane for histological analysis by a blinded investigator.

322

### 323 ***EV injections***

324 To investigate whether young EVs have a beneficial effect on skeletal muscle regeneration of  
325 aged male mice, animals were injected with  $\sim 5 \times 10^8$  EVs intramuscularly to the TA muscle three  
326 days after injury. Next, aged mice were injected with EVs from young *Klotho*<sup>+/+</sup> and *Klotho*<sup>+/-</sup>  
327 mice. For this, the aged mice received two intramuscular injections of  $\sim 7.5 \times 10^8$  EVs at three- and

328 five-days post-injury. EVs were pooled from isolations of at least four different mouse serum  
329 samples.

330

### 331 ***Animal injury model***

332 Mice were first anesthetized with 2% isoflurane and then received bilateral injuries to the  
333 tibialis anterior (TA) muscles via intramuscular injection of cardiotoxin (10  $\mu$ L of 1mg/mL  
334 cardiotoxin per TA). Animals were provided with an ingestible medigel, Carprofen, for pain  
335 management. Fourteen days following injury, the animals were subjected to an *in situ* contractile  
336 testing protocol to evaluate the injured muscle's force producing capacity. Following the  
337 contractile testing, blood was isolated from the mice using a cardiac puncture. The animals were  
338 then euthanized, and TAs were harvested for histological analysis.

339 Animals displaying evidence of external injuries and/or tumor growths were not included in  
340 the study. We have found that some animals exhibit very severe injuries following injection,  
341 whereas other animals display almost no functional deficit, as determined by the hang-impulse  
342 testing. Therefore, with the goal of increasing the homogeneity across groups, animals were  
343 tested one day after cardiotoxin injection, and only those animals displaying a hang-impulse  
344 score within 25-75th percentile of the mean (range: 0.40-0.74 fold-change 14 dpi score when  
345 compared to 1 dpi score) were subsequently randomized to one of the experimental groups (a  
346 total of 16 animals fell outside the range). We chose the 25-75th percentile as a conventional  
347 range to exclude potential outliers that fall in the 1st or 4th quartiles of the data set.

348

### 349 ***In situ contractile testing***

350 Contractile testing was performed 14 days after injury using an *in situ* testing apparatus  
351 (Model 809B, Aurora Scientific Inc, Canada), stimulator (Model 701C, Aurora Scientific Inc,  
352 Canada), and force transducer (Aurora Scientific Inc, Canada). Briefly, the peroneal nerve of  
353 anesthetized animals was isolated through a small incision lateral to the left knee. Mice were  
354 then placed supine on a 37°C-heated platform and the foot being tested was positioned on the  
355 footplate. The left hindlimb used for testing was stabilized with cloth tape on the knee and foot.  
356 Muscles were stimulated through the peroneal nerve by an electrode inserted beneath the skin.  
357 Muscle peak twitch, time to peak twitch, and half-relaxation time with the ankle positioned at  
358 20° of plantarflexion (the position that we determined to result in the greatest force output) were



359 quantified. Stimulations at 10, 30, 50, 80, 100, 120, 150 Hz were elicited to obtain a force-  
360 frequency curve, with a 2-minute rest between each contraction. Bilateral TA muscles were  
361 subsequently harvested and frozen in nitrogen-cooled 2-methylbutane for histological analysis by  
362 a blinded investigator.

363

### 364 *Immunofluorescence imaging*

365 Cell-seeded chamber slides were fixed with warm 2% Paraformaldehyde for 15 minutes, then  
366 washed with phosphate-buffered-saline (PBS) three times. The samples were then permeabilized  
367 with 0.1% Triton-X for 15 minutes after which the samples were blocked with 3% BSA and  
368 0.1% Triton-X for 45 minutes. A similar process was followed for muscle cryo-sections up to the  
369 point of the blocking step. After blocking, the samples were incubated overnight at 4°C with the  
370 following primary antibodies in antibody solution (3% BSA+5% Goat Serum+0.1% Triton-X), at  
371 the dilutions mentioned below:

372

| Antibody   | Host-species | Product number                           | Dilution |
|------------|--------------|------------------------------------------|----------|
| MyoD       | Rabbit       | SCBT, sc-760                             | 1:500    |
| MyoD       | Mouse        | sc-377460                                | 1:500    |
| Desmin     | Rabbit       | Abcam, ab15200                           | 1:500    |
| Klotho     | Rat          | R&D systems, MAB1819, Lot#<br>KGN0315101 | 1:400    |
| Laminin    | Rabbit       | Abcam, ab11575                           | 1:500    |
| Collagen I | Rabbit       | Abcam, ab21286                           | 1:500    |
| SDHA       | Mouse        | Abcam, ab14715                           | 1:500    |
| Pax-7      | Rabbit       | Abcam, ab187339                          | 1:100    |
| Pax-7      | Mouse        | DSHB                                     | 5 µg/mL  |

373

374 After incubating the samples with primary antibodies overnight, samples were washed with  
375 PBS three times, after which they were incubated with host-specific secondary antibodies in  
376 antibody solution for one hour at room temperature at the dilutions mentioned in the table below:

377

| Antibody       | Host-species | Product number            | Dilution |
|----------------|--------------|---------------------------|----------|
| AlexaFluor 594 | Rabbit       | Life Technologies, A11012 | 1:500    |
| AlexaFluor 488 | Rat          | Life Technologies, A11006 | 1:500    |
| AlexaFluor 594 | Rat          | Life Technologies, A11007 | 1:500    |
| AlexaFluor 488 | Mouse IgG1   | Life Technologies, A21121 | 1:500    |
| AlexaFluor 594 | Mouse IgG2b  | Life Technologies, A21145 | 1:500    |
| Phalloidin 647 | N/A          | Life Technologies, A22287 | 1:500    |

378

379 After a triple wash with PBS, the cells were incubated with their respective secondary  
380 antibodies, goat-anti Rat Alexa Fluor 488 or 594, goat anti-Rabbit Alexa Fluor 546 and  
381 Phalloidin 647 in 3% BSA+5% Goat Serum+0.1% Triton-X was diluted 1:500 for 60 minutes.  
382 Following a triple wash with PBS, the chamber slides were stained with DAPI for 2 minutes and  
383 then washed with PBS again. The chamber sides were mounted with a glass coverslip using  
384 Gelvatol (Source: Center for Biologic Imaging (CBI), University of Pittsburgh) as a mounting  
385 media. These were dried in 4°C for at least three hours before imaging. Imaging was performed  
386 using 20X magnification on Zeiss-Axiovision microscope.

387 For Nonyl Acridine Orange (NAO) staining (Thermofisher, A1372), the fixed and  
388 permeablized cells were stained with 5  $\mu$ M NAO made in HBSS (-Ca<sup>2+</sup>, -Mg<sup>2+</sup>), for 15 minutes.  
389 The cells were then washed with PBS, following which the cells were stained with DAPI for two  
390 minutes and washed with PBS again. The cells were mounted with a glass coverslip using  
391 Gelvatol (Source: Center of Biologic Imaging, University of Pittsburgh). The slides were dried at  
392 4°C and imaged using 20X magnification on Zeiss-Axiovision microscope using the FITC  
393 channel to measure reduced cardiolipin.

394 Imaging analysis was done using ImageJ. For *in vitro* experiments, Klotho, NAO, and  
395 SDHA were quantified as protein per cell. Pax7, MyoD, and Desmin were quantified as  
396 percentage of cells positive for those markers divided by total number of cells within an image.  
397 For *in vivo* experiments, SDHA was quantified as a function of protein level in every centrally  
398 nucleated (regenerating) fiber. For this, the myofibers were manually traced and integrated  
399 density of SDHA was computed for each of the traced myofiber as the output. A total of SDHA  
400 expression in all regenerating myofibers were quantified as output for each image. Collagen I

401 was quantified as total protein per unit area of image taken. Area of regenerating myofibers were  
402 quantified by manually tracing the laminin in the myofibers.

403

#### 404 ***RNA-seq analysis***

405 TA muscles from the three groups of aged animals (young serum injections, depleted young  
406 serum, or saline injections) were collected for RNA sequencing on day 23 to Novogene  
407 Corporation, Inc. Quality control of all RNA samples was performed on an Agilent 2100  
408 Bioanalyzer instrument and samples with RIN > 5.5 and total RNA yield > 400 ng were further used  
409 for library construction. Only those samples that passed the quality check requirements for library  
410 preparation with poly A enrichment were utilized in this study (3 animals from sham, 4 animals  
411 from young serum, and 4 animals from young serum depleted of EVs groups). Libraries were  
412 sequenced on NovaSeq 6000 with PE150 strategy. Poor quality reads were eliminated with the  
413 criteria for Phred score Q30 >80%. Reads with adaptor contamination and uncertain nucleotides  
414 (N) with > 10% content was removed. PartekFlow STAR - 2.7.3a was used to align reads to  
415 mm10 genome. Uniquely aligned reads were used for downstream analysis.

416 Principal component analysis (PCA) performed in R revealed the distinction between groups.  
417 Linear discriminant analysis (LDA) was done with first 6 PCs was used to reduce dimensionality  
418 and visualize clearly separate clusters. Further DeSeq2 was performed with FDR<0.1. The Venn  
419 diagram (Fig 3b) shows global differentially expressed (DE) genes with log fold change (LFC)  
420 magnitude > 0.1. Gene Ontology (GO) enrichment analysis was performed using Enrichr  
421 (Maa'yan lab) with cut-offs of FDR < 0.1, LFC > 1.5. First, genes with LFC magnitude greater  
422 than 1.5 was performed. The GO terms were ranked based on combined score ranking.

423

#### 424 ***Human serum collection***

425 Human serum was purchased from a commercially available vendor, Innovative  
426 Research. Blood was collected from young males (18-35 years) and aged males (65-80 years)  
427 and serum was collected off-the-clot. No collection was performed at the University of  
428 Pittsburgh.

429

430

431

432 ***Probing CD63, CD81 and Klotho mRNA in circulating EVs for ImageStream analysis***

433 PrimeFlow™ was performed according to the manufacturer's instructions. Two standard  
434 20bDNAs Mouse Klotho oligos probe sets VB1-6001084 (Part No. 6003837) and VB10-  
435 6001085 (Part No. 6003838) tagged with Type 1 Alexafluor AF647 and Type 10 Alexafluor  
436 AF568 dyes, respectively were utilized. Expression of total mRNA was reported based on the  
437 sum of fluorescence intensities of type 1 and type 10, at the single EV resolution. The Type 1  
438 probe was designed to hybridize to region 2803-3753 of the full canonical Klotho sequence. The  
439 Type 10 probe was designed to hybridize to region 2585-3597 of the full Klotho\_202 sequence.  
440 To probe for human Klotho mRNA, probe set VA1-3005823-PF tagged with Type 1 Alexafluor  
441 AF647 was utilized. Expression of total mRNA was reported based on total intensity of Klotho  
442 mRNA per EV. The sequences targeted by the probe are listed below.

443 Circulating EVs from four young animals and four aged animals were pooled together to  
444 form one sample each of the young and aged groups. The EVs were then fixed with equal parts  
445 of RNA Fixation Buffer 1A and 1B for 30 minutes at 4°C. The EVs were then centrifuged at  
446 16,100 g at 4°C for 30 minutes and the supernatant was discarded. EVs were incubated with  
447 CD63 (Santa Cruz, sc-5275) and CD81 (Santa Cruz, sc-7637) in RNA permeabilization buffer  
448 with 1X RNase Inhibitors, at 4°C in the dark for two hours. The target probes (VB1-6001084  
449 (Part No. 6003837) and VB10-6001085 (Part No. 6003838)) were then thawed to room  
450 temperature. In the meantime, the EV suspensions were washed with RNA wash buffer and  
451 centrifuged at 16,100 g at 4°C for 30 minutes. Target probes were diluted 1:20 in target probe  
452 diluent and 100 µL of the diluted probes were added to each EV suspension. These were  
453 incubated for two hours in a dry oven at 40°C. After the incubation period, wash the samples  
454 with RNA wash buffer with 1X RNase inhibitors and centrifuge at 16,100 g for 30 minutes at  
455 room temperature. The supernatant was removed till the 100 µL level, re-suspended in the  
456 residual volume and stored in the dark at 4°C, overnight.

457 The next day, the EV samples were brought to room temperature and 100 µL of pre-amp  
458 mix was added to each sample. These samples were incubated at 40°C for 1.5 hours. After  
459 washing with RNA wash buffer, the samples were centrifuged at 16,100 g for 30 minutes at  
460 room temperature. During this time, the probe labels were thawed on ice. Next, 100 µL of amp-  
461 mix was added to each sample and incubated at 40°C for 1.5 hours. Next, the samples were  
462 mixed with wash buffer, centrifuged at 16,100 g for 30 minutes at room temperature. The

463 supernatant was removed until the 100  $\mu$ L mark and the residual volume was re-suspended. The  
 464 thawed probe labels were diluted 1:100 in label probe diluent and 100  $\mu$ L of this was added to  
 465 each of the EV sample. The samples were incubated at 40°C for one hour. The samples were then  
 466 mixed with wash buffer and centrifuged at 16,100 g for 30 minutes at room temperature. The  
 467 supernatant was removed, and the residual volume was stored in IC fixation buffer provided in  
 468 the kit, overnight at 4°C. Prior to taking the samples to flow imaging, the samples received 1  $\mu$ L  
 469 of PKH26 for 10 minutes. The samples were washed in wash buffer and centrifuged at 16,100 g  
 470 for 30 minutes at 4°C. The supernatant was removed until the 100  $\mu$ L mark and the residual  
 471 volume was mixed gently. These samples were imaged on Imagestreamx MarkII system at the  
 472 flow cytometry core of the Department of Immunology at the University of Pittsburgh. The EVs  
 473 were gated for size and positive signal of PKH26 (see below for gating strategy). Three  
 474 independent runs were done for staining and imaging of EVs.

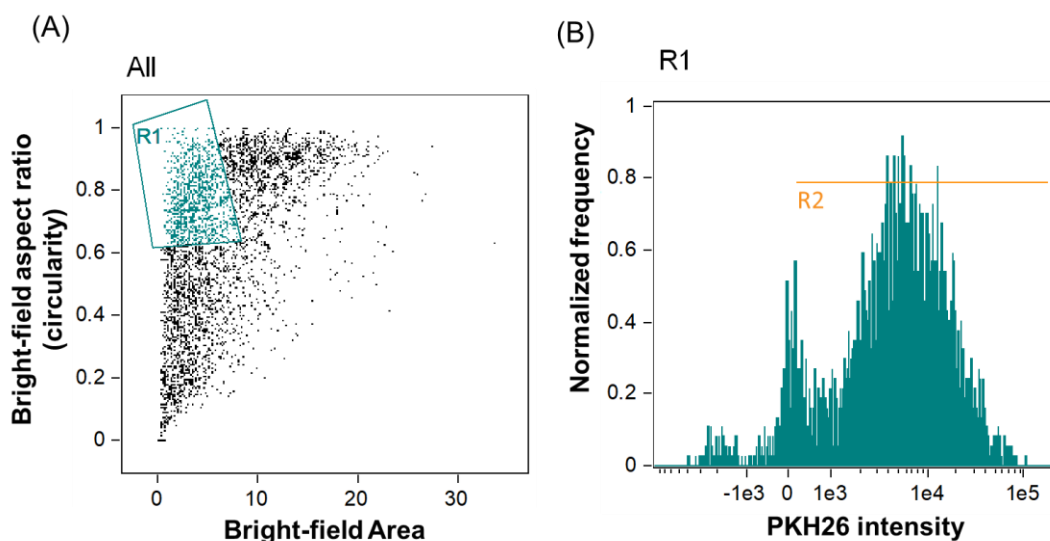

475  
 476 **Representative gating strategy for acquisition of EVs on ImageStream instrument.** A gating strategy  
 477 to include nanoparticles with (A) high circularity and small area (R1), and (B) positive PKH26 signal  
 478 (R2) was used to image the young and aged serum EVs.  
 479

480 Information on the probes designed to target Klotho transcripts in circulating EVs are as follows:

481 **1. Type 1 probe (mouse Klotho):**

482 Accession: NM\_013823.2

483 Region covered by Probe-set: 2803 – 3753 (951bp) (red region)

484 GATAATCATTGCTCGTGGGGCGGCGGGAGCGGGGGTGGGCACCGCGTAGGGAGGGCGGCGGGGCGCG  
485 GGCATATAGGGGCGCGGCGCGGTGCCCTCCGGCTCCCGCAGCATGCTAGCCCCGCGCCCTCCTCGCC  
486 GCCCCGCCGCGGCTGGTGTGCTCCGTTTGTGTTGCTGCATCTGCTGCTGCTCGCCCTGCGCGCCCGCT  
487 GCCTGAGCGCTGAGCCGGGTACAGGGCGCGCAGACCTGGGCTCGTTTCGCGCGCGCTCCTGCCCCAGAG  
488 GCCGCTGGCCTCCTCCACGACACCTTCCCCGACGGTTTCTCTGGGCGGTAGGCAGCGCCGCCTATCAG  
489 ACCGAGGGCGGCTGGCGACAGCACGGCAAAGGCGCGTCCATCTGGGACACTTTCACCCATCACTCTGG  
490 GGCGGCCCCGTCGACTCCCCGATCGTCGTGGCGCCGTCGGGTGCCCGTCGCCTCCCCTGTCTCCAC  
491 TGGAGATGTGGCCAGCGATAGTTACAACAACGTCTACCGCGACACAGAGGGGCTGCGCGAACTGGGG  
492 GTCACCCACTACCGCTTCTCCATATCGTGGGCGCGGGTGTCTCCCAATGGCACCGCGGGCACTCCCAA  
493 CCGCGAGGGGCTGCGCTACTACCGCGGGTGTCTGGAGCGGCTGCGGGAGCTGGGCGTGCAGCCGGTG  
494 GTTACCCTGTACCATTGGGACCTGCCACAGCGCTGCAGGACACCTATGGCGGATGGGCCAATCGCGC  
495 CCTGGCCGACCATTTACAGGATTATGCCGAGCTCTGCTTCCGCCACTTCGGTGGTCAGGTCAAGTACTG  
496 GATCACCATTGACAACCCCTACGTGGTGGCCTGGCACGGGTATGCCACCGGGCGCCTGGCCCCGGGCG  
497 TGAGGGGCAGCTCCAGGCTCGGGTACCTGGTTGCCACAACCTACTTTTGGCTCATGCCAAAGTCTGG  
498 CATCTTACAACACCTCTTCCGCCCCACACAGGGAGGGCCGGGTGTCTATCGCCTTAAGCTCCCATTGG  
499 ATCAATCCTCGAAGAATGACTGACTATAATATCAGAGAATGCCAGAAGTCTCTTGACTTTGTGCTAGG  
500 CTGGTTTGCCAAACCCATATTTATTGATGGCGACTACCCAGAGAGTATGAAGAACAACCTCTCGTCTCT  
501 TCTGCCTGATTTTACTGAATCTGAGAAGAGGGTTCATCAGAGGAACTGCTGACTTTTTTGTCTCTCCTT  
502 CGGACCAACCTTGAGCTTTCAGCTATTGGACCCTAACATGAAGTTCGCCAATTGGAGTCTCCCAACCT  
503 GAGGCAGCTTCTGTCTTGGATAGATCTGGAATATAACCACCCTCCAATATTTATTGTGGAAAATGGCTG  
504 GTTTGTCTCGGGAACCACCAAAAGGGATGATGCCAAATATATGTATTATCTCAAGAAGTTCATAATGG  
505 AAACCTTAAAAGCAATCAGACTGGATGGGGTCGACGTCATTGGGTACACCGCGTGGTCGCTCATGGAC  
506 GGTTTCGAGTGGCATAGGGGGCTACAGCATCCGGCGAGGACTCTTCTACGTTGACTTCTGAGTCAGGA  
507 CAAGGAGCTGTTGCCAAAGTCTTCGGCCTTGTCTACCAAAGCTGATAGAGGACAATGGCTTTCCTC  
508 CTTTACCTGAAAACCAGCCCCTTGAAGGGACATTTCCCTGTGACTTTGCTTGGGGAGTTGTTGACAAC  
509 ACGTTCAAGTGGACTACTCTCTCTCAGTTTACTGACCCGAATGTCTATCTGTGGGATGTGCATCACA  
510 GTAAGAGGCTTATTAAGTAGACGGGGTTGTAGCCAAGAAGAGAAAACCTTACTGTGTTGATTTCTCT  
511 GCCATCCGGCCTCAGATAACCTTACTTCGAGAAATGCGGGTACCCACTTTCGCTTCTCCCTGGACTGG  
512 GCCCTGATCTTGCCTCTGGGTAACCAGACCCAAGTGAACCACACGGTCTGCACCTTCTACCGCTGCATG  
513 ATCAGCGAGCTGGTGCACGCCAACATCACTCCAGTGGTGGCCCTGTGGCAGCCAGCAGCCCCGCACCA  
514 AGGCCTGCCACATGCCCTTGCAAAACATGGGGCCTGGGAGAACCCGCACACTGCTCTGGCGTTTGCAG  
515 ACTACGCAAACCTGTGTTTTAAAGAGTTGGGTCACTGGGTCAATCTCTGGATCACCATGAACGAGCCA  
516 AACACACGGAACATGACCTATCGTGCCGGGCACCACCTCCTGAGAGCCCATGCCTTGGCTTGGCATCT  
517 GTACGATGACAAGTTTTAGGGCGGCTCAGAAAGGCAAAATATCCATCGCCTTGCAGGCTGACTGGATAG  
518 AACCAGCCTGCCCTTCTCTCAAAATGACAAAGAAGTGGCCGAGAGAGTTTTGGAATTTGATATAGGC  
519 TGGCTGGCAGAGCCTATTTTTGGTTCCGGAGATTATCCACGTGTGATGAGGGACTGGCTGAACCAAAA  
520 AAACAATTTTCTTTTGCCTATTTACCCGAAGATGAAAAAAAGCTAGTCCGGGGTTCTTTGACTTCT  
521 GGCGGTGAGTCATTACACCACCTTCTGGTAGACTGGGAAAAGGAGGATCCGATGAAATACAACGAT  
522 TACTTGGAGGTACAGGAGATGACTGACATCACATGGCTCAACTCTCCAGTCAGGTGGCAGTGGTGGC  
523 TTGGGGGCTGCGCAAAGTGTCAACTGGCTAAGGTTCAAGTACGGAGACCTCCCAGTGTATGTGACAG  
524 CCAATGGAATCGATGATGACCCCCACCCGAGCAAGACTCACTGAGGATCTATTATATTAAGAATTAT  
525 GTGAATGAGGCTCTGAAAGCCTACGTGTTGGACGACATCAACCTTTGTGGCTACTTTGCGTATTCACTT  
526 AGTGATCGCTCAGCTCCCAAGTCTGGCTTTTATCGATATGCTGCGAATCAGTTTGAGCCCAAACCATCT  
527 ATGAAACATTACAGGAAAATTATTGACAGCAATGGCTTCTGGGTTCTGGAACACTGGGAAGGTTTTG  
528 TCCAGAAGAATACACTGTGTGCACCGAATGTGGATTTTTTCAAACCCGGAAGTCTTTGCTGGTCTTCAT  
529 CTCGTTTCTGTTTTTACTTTTATTATTCTCTTGTCTCATTTTTTCACTACTCCAAGAAAGGCCAGAGA  
530 AGTTATAAGTAATGTGAACGTCTGCCTGGCCATTCGCTTTGGGATCAAGATGTACACGCCGTACGCCG  
531 TTTGCACCTCTCTGTGTTGTGAGCCGATTCCACACATTTGATTCTAGAAAACCTTTTTGTGATGGGT  
532 GGTAGAGGTTTTAAACAGGAATTGGTGAGAATAAAATATTGCAGGGTGAATGGTATCTGAATCTGCTC  
533 TCTTTGGTGGCAATTACCGAATTATACTCACCACAGTTTCTACAGTGCCCCGGAATGGAAGGCATAGA  
534 ATACGGTAGGGATAACAGTGCCAAGCAGACAGAAGTTTTAAAGAACAACCTTTAGGGACTTGTATCCA  
535 TGCCATTTTTAAATCACTCCTGTTGGGGAGTAACACTCTCTCAATTACCATCTTAACACCTGGACTTT

536 ACCTGATCCAGTTTTACAAGGTGAAGTAGAAAAATATCCAGTAAAGGTGGCCAAGAGCCCTGAGTCCA  
537 GAGCAGCCCATTAAAGAAGCACTATTCCTACCAAATGCTGCTAATGTCAATTTACAAATATACTTAGAA  
538 AGCACATTATGGACATTTGTATTCTTGTGAATGTTTTTGGAGGTGTGCCCTAAACCCAGATCCTTGAGG  
539 GCTTTCTCTTACCAACTTTCCTTTCAGAGCCTGCTTGTGGAGATTCTTCCCCAGCCCCCTTCCCCTTTC  
540 CCTCTTGCTCTGCCCCACCTCGCTCCACCCAGCTTGCTCCAGCCCAAAGATTCTTTATTTGTTTCTCATT  
541 ACCGAAGGTTGTGAGCCACCATGTGGTTTCTGGGATTTGAACTCATGACCTCCGGAGGAGCTGTCATG  
542 CTCTTAACCAGCCCATGTTGAAGATTCTTTTGATAAATATTCACAAAAAATAAAGATGAGCCATGAGC  
543 TGTTGGCCTCTTCGGAAGCGGAAACTGAGTGATTGATTGAACATCCTTTTATCTTTGACCAGACCTTG  
544 GAATGAATGCAATGACCTTTCACAGGAAGAAGGAGGAGCTCTCAGTCAAACCTGTAAAGAATGCCT  
545 CTTCAGAATATGCTGTCAGTGCTTGGATGCCATGATGTTCAACTTCTTAGTCGATCCGGCAGCAATCA  
546 CAGTGTGAGCACACTGGGAACCTGTCCTTTCGGCCCGGAGATCTACCGTGTGCTTCTGTGAAGAGGC  
547 TTTGACGTAGCCCCTCTTTGAGCTCTTACACCATGCTACTGACTTCTAGAAAGGCTAATTAGGTCTTCTT  
548 CTACACCTAATACCCTAAGTCTTACTGACTCTCACGGGAGAAGTCTCTGTGCTACACCTGAGTGGTCTT  
549 ATTGATAACCCTGATACCAGATCAGGCAAGATAAATCCGTCATAGCAGGCATGGCTACCCTTGCTGCC  
550 ACAGGGTCACAGCACATAGCTCATCACCTGTTATTCTTCATCTTGCAATGTGGTATGGTTTTCTGGT  
551 GAATGATCAGCTTTTTGCTGTGGTATTCTTTATACATCTGGACTTATTATTGAAATCAAATGCTATAGAA  
552 TCAATAGTTTATTTTATGTCTATTTTTCTTGATCGCAGAGTAATATATATTAATTGTAAAAAATTTAAGA  
553 AACAAAACTATATGTAAAGAAAAAATTATAATATAATACAGAGATGCTGCTGACAGTTCCCTATGTGT  
554 TGTGTTTTGTATACTGAGATCATGTGATACGTAGGCATACATCTTCTTGGGTTTTTTTTGTTTTTTTT  
555 GTTTTGTTTTGTTTTGTTTTGGTTTTTTGAGATAGGGTTTCTCTGTATAGCCCTGGCTGTCCTGGAATC  
556 ACTTTGCAGACCAGGCTAGCCTCAAACCTTATTTCATTTTTACTGAAGTAATTTTTCTGTCATTAGTCTT  
557 CAAGAGCAAACCTTTAATAGTTATGGAGAATATTGCCAGAACAGCTCAAACCTGTTTTATTTGTTGGT  
558 CCAATTTCCCATTAATTAGTTCAATAATAAATATCATTTAGAAATAAAAAAA

559

560 **2. Type 10 probe (mouse Klotho):**

561 Accession:ENSMUST00000202096.1 K1-202

562 Region covered by probe-set: 2585 – 3597 (1013bp) (red region)

563 **eggctcccgcagcatgctagccccgcgccctcctcgcgcccccggctggtgctgctccgttgctggtgctgcatctgctgctgctgcccctgcgcgcccgctgc**  
564 **ctgagcgcctgagccgggtcaggcgcgcagacctgggctcgttcgcgcgcctcctgccccagagcccctggcctcctccacgacacctccccgacggttctc**  
565 **ctgggcggtaggcagcgcgcctatcagaccgaggcggctggcgacagcacggcaaggcgcgtccatctgggacacttcacccatcactctggggcggcccc**  
566 **gtccgactccccgatcgtcgtggcgcctcgggtgccccgtcgcctcccctgtcctccactggagatgtggccagcgcgatgttacaacaacgctaccgcgacacagag**  
567 **gggctgcgcgaactgggggtcaccactaccgcttctccatctcgtgggcgcgggtgctccccaatggcaccgcgggactcccaaccgcgaggggctgcgctacta**  
568 **ccggcggctcgtgagcggctcgggagctgggcgtgcagccgggtgttacctgtaccattgggacctgccacagcgcctgcaggacacctatggcggatggcc**  
569 **aatcgcgcctggccgaccattcagggattatgccgagctcgttccgccacttcggtggtcaggtcaagfactggatcaccattgacaaccctacgtggtggcctgg**  
570 **cacgggtatgccaccggcgcctggccccggcgtgaggggacgtccaggctcgggtacgtggtgcccacaacctacttttgctcatgccaagtctggcatctct**  
571 **acaacctctttccgccccacacaggaggccgggtgtctatcgccttaagctcccattggatcaatcctcgaagaatgactgactataatatcagagaatgccagaagt**  
572 **ctcttgactttgctagctggtttgccaaccataattatgatggcactaccagagagtatgaagaacaacctctcgtctcttctgctgatttactgaactgagaag**  
573 **aggctcatcagaggaactgctgactttttgctctccttcggaccaaccttgagctttcagctattggaccctaacatgaagtccgcaattggagtcccaacctgagg**  
574 **cagcttctgcttgatagatctggaatataaccacctccaataattatgtgaaaatggctggtttgctcgggaaccacccaaaaggatgatgccaatafatgtattatc**  
575 **tcaagaagtataatggaaacctaaagcaatcagactggatgggctgacgtcattgggtacaccgcgtgctcgtcatggacggtttcgagtggcataggggctac**  
576 **agcatccggcgaggactctctactgtgactttctgagtcaggacaaggagctgtgccaaaagctctcggcctgttctaccaaaaagctgatagaggacaatggcttctcc**  
577 **ttfacctgaaaaccagccccgtgaaggacatttccctgtgactttctggtgggagttgtgacaactacgttcaagt**aaagtccttgacaaaaccagtgctgcgctctgctt  
578 cctcactaagctctgccaaggcacagtgtgggacgttgagccaaacagggttccctagtgacttatgaactacatagctctgaacgctcagcttcaaacatcttcaa  
579 tctacatctgtgctctccattaggtccaagggaacagattcaaacatgaatatgtaagctctgtaagacaatacaagataaggcacttcccttgggtgtacgctgg  
580 ggtccctgctcaggaagtaagttttcataataagattcaacacagaagtcggagcatctcagggaagtgctgagaatgctgagcatttagcagatttctcctcact  
581 gtaaatgccccactccaggtcatagaaaaaaatctcaaaaagcaaacattgattcaatgatttattgatagcaccaaggcattccaaaatgatcagttagtattactg

582 agcatcaaaactgtgtaggaagtccctcaaaaccattttatTTTTtagttccccagtgttaaagtgactgtttcttgggttgaccaatactttatgtaagcacttgctgactgcc  
583 agttgtgtatgaaacccccatgggggtgctgggtccctttgtgaggaagaccaaaagttcagtatctgtagtcagatctcaaggtttagcatggtggagctggctcagtggt  
584 ctcaacctctaatgccaccgccctttaacgggtcctcatgtttagtgacaccaaaaccatgatattttttggtctacctataatgfaagttggcacggctatgtattg  
585 taatgtaaatatctgtttttctgatggcttaagcaatctgtgaaagggtttgacctcaaaaggccgtgaccacaggtgagaactactgtttagtccagaaggag  
586 gggtcacaagtgtgacttcaaaagaataattcggaaaaatgcttaggtccaaggggagcttcttattggaatggaattttggtctctgtagatagcaaatgctttgtttgt  
587 ttgaagtacatcgctatcctgatgtatttgcctctgtgatgtaagatgctctttggctcttagactatgtagctcaatctagaggtgattttggacttaagtctctcttac  
588 ctcaaaagacagctgagcaatgttgagtgagctctattgaggcctgggatggcaccatagggtctcatggtgtgtttccagcttgggtctattgacagctagttgaaca  
589 gtgggggtgctgggtctactggaagaggtctttagatcacaagggtcatgtctaaagagagtagtgggacctcaaccctttctctcttttctctattttatcatgaaa  
590 caagcagtttgcatactctgtgccccgactctgggtgtccaacttaccacagctccccaaacagtggagccattgattgttccgggacatccaaagtcatgagccca  
591 aatcagccttggtctctgatttctcaggtttgctagaactgacaggatgttagccaatcagtaacatcagcaccatcctgctcagtggtgaggtattttctgctccatctccc  
592 acttctctcagaacaaggctatctgattgtcctatcctaattcgtcagatctacagtgaaagtttaggttagctctaatgtggcagaatggagatgcaaggagggag  
593 aagaagataatgtgtccacatccccctcttacctttttggggccaggagtagattagatagctctggtcttgttatttcttaccttggaggttctctgctggcc  
594 acatcctgactggaggtcacacacattgtctgcatagcagctggagctgccaagtactctgttacagtcagctactcagactgcactctgtacagcgagacagg  
595 gctgtgtgggaaggccattctctcccacctgtcctcctaaaggtattgtgtcttcacagcgtgaaagtcaggggtttgtctgatgttcttgaagagaagggaaccc  
596 caatcagaatcaaatcatggcagtgataggaatgtgaggggtggggaggagaagcttgtttgtttttgattttgtatctctcattttgcaggacctgtacctgctag  
597 tcaactgtactgagtcacacatcaactcctaaggctgtgtcaggatctcaccagacatcagcagatgcaatggccccagctcctctctgtctacattgttgatcatctac  
598 tcagggtgtctgactgctacatgttcaaggccctctgcatctctgtgalcccaacccaaateccaaaatccatattcaacctgtgtgtgtaaacgctctggaagct  
599 cccgggtgggaacaggctatagttagggttactctgctgctgctgctgctgcttctcttaggtcatcagactcctctcaagacaacccccggctgacagcatcag  
600 aacgcctaattgttctctcagtgtagctgggtgtctttgtgacaagcagggtcagcacgtctacaacattatgttacgttagtctcaagaagtgatttttttaacgaat  
601 ttgtattagtcttgggggattctatagtgaaattgggtcatatttacttctcttattatccccctaactcttccagatccattcacatcttccaaacccccaaactcacattgtc  
602 ccacctctcatatggacatttactgtgattgtattgcccagcaactcctgtgggggaccatcctctggaattgtgccacctacgaagacctacatcctaaaggaaaatt  
603 cactctcctgccctaaaagccattatcttgagcaggtgctcaagaacctattttcttctctcccttttcttctcttctctctctctctctctctctctctctctct  
604 ctttcttctctctctctctctcttcttcttcttcttcttcttctctcttctctctctctctctctctctctctctctctctctctctctctctctctctctctc  
605 cccttctctctctctctctttatgttcatgctgactggcttctctgttagacaaccccagatgctgtgagttcatgagtacagaggttctatctctgtactcccaacc  
606 tctgctgacaacctctctctcttagatggctcctgagttgtgagttctatgaaccactgtcactgcaccaagaaacttaagaagtgatttaaaaaaaaaaaacctaa  
607 agtttcttcttctctctctggttagtctcactcaagagttgggtcatatatttccccaataaataaaaaatccccctagccaggtgatgggtggtcacaccttagtcc  
608 cagcactcaggaggcagagggcaggtggtatctgtgagtttgagggccgctgctgcagagtgagttcaagacagccagggctacacagagaacctgtcttgaa  
609 aaacaaaaacaaaacaaacaaatgtatgtgtgtgtaggggtgatgatgatgtgtatgatactgtgtgtgtgtgtgtgtgtgtatctcctagctacacaccacc  
610 tgttagaagttgtagctgggcacatccacatgggggagggggtcactttgtcacaaccagtgtcccagctcctgagttgcttctcatgctactggtgtgttagtgacc  
611 aaaatgaagcaggttacatacaacatagacatcatgtgtgctactgctgtgagagagactttatcaataaacaattgaatatatgtttgtctcaacctcctcagacct  
612 attttacttttagtaaacctaaggcagcaagctgctataataaagttagaggaactttgctgcacactcattctacattttcttagttggagaactgacctaccatctg  
613 caactttacatggtcttctactgtttagtagtagactcaatagaaactgtattctgggatggttctgtagagaagttgtgaatttagtacattcagagttgaataaaaaata  
614 cc

615

### 616 3. Type 1 probe (human Klotho):

617 Accession: NM\_004795.3

618 cgcgcagcat gcccgcagc gccccgcgc gccgcccgc gccgcgccg ccgtcgtctg  
619 cgctgctgct ggtgctgct ggctggggc gccgcccct gcgtgcggag ccgggcgacg  
620 gcgcgcagac ctgggcccgt ttctcgggc ctctgcccc cgaggccgc ggctcttcc  
621 agggcacct ccccgacggc ttctctggg ccgtggggc cgcgcctac cagaccgag  
622 gcggctggca gcagcagggc aagggtgcgt ccatctggga tacgttcacc caccacccc  
623 tggcacccc gggagactcc cggaaccca gtctgccgtt gggcgcgccg tcgccgtgc  
624 agccccac cggggacgta gccagcgaca gctacaaca cgtctccc gcacagggag  
625 cgtgcgcga gctcggggc actcactacc gcttccat ctctggggc cgagtgcctc  
626 ccaatggcag cgcgggcgct cccaaccgc aggggctgc ctactaccg gcctctctg  
627 agcggctgc ggagctggc gtgcagccc tggcaccct gtaccactgg gacctgccc  
628 agcgctgca gtcagcctac ggcggtggg ccaaccgc cctggccgac cactcaggg  
629 attacgga gctctgctc cgcacttcg gcggtcaggt caagtactg atcaccatg  
630 acaacccta cgtggtggc tggcacgct acgccaccg gcgctggcc cccgcatcc



631 ggggcagccc gcggtcggg tacctggtgg cgcacaacct cctcctggct catgccaag  
632 tctgcatct ctacaact tcttccgtc cactcaggg aggtcaggtg tccattgcc  
633 taagctctca ctggatcaat cctcgaagaa tgaccgacca cagcatcaaa gaatgcaaa  
634 aatctctgga cttgtacta ggttggttg ccaaacctgt atftattgat ggtgactatc  
635 ccgagagcat gaagaataac ctttcatcta ttctgcctga tttactgaa tctgagaaaa  
636 agttcatcaa aggaactgct gactttttg ctctttgctt tggaccacc ttgagtttc  
637 aacttttggg cctcaccatg aagttccgcc aattggaatc tccaacctg aggcaactgc  
638 tttcctggat tgacctgaa ttaaccatc ctcaaatatt tatttggaa aatggctggt  
639 ttgtctcagg gaccaccaag agagatgatg ccaaatatat gtattacctc aaaaagtca  
640 tcatggaaac cttaaagcc atcaagctgg atggggtgga tgcacatggg tataccgeat  
641 ggtccctcat gtaggttgc gtagtggcaca gaggttacag catcaggcgt ggactctct  
642 atgtgactt tctaagccag gacaagatgt tgtgcaaaa gtcttcagcc ttgttctacc  
643 aaaagctgat agagaaaaat ggcttccctc ctttacctga aatcagccc ctagaagggg  
644 catttccctg tgactttgct tggggagtg ttgacaacta cattcaagta gataccactc  
645 tgtctcagtt taccgacctg aatgtttacc tgtgggatgt ccaccacagt aaaaggctta  
646 ttaaagtgga tggggtgtg accaagaaga gaaatccta ctgtgtgac ttgtgcca  
647 tccagccca gatcgttta ctccagaaa tgcacgttac acatttccgc ttctccctgg  
648 actggccct gatttccct ctgggtaacc agtccaggt gaaccacacc atctgcagt  
649 actatcctg catgctcagc gagcttgcg gtgtcaacat caccacagt gtggcctgt  
650 ggagcctat ggccccgaac caaggactgc cgcgcctct gccaggcag ggcgcctggg  
651 agaaccctca cactgcctg gcctttgcag agtatgccc actgtgctt caagagctg  
652 gccatcacgt caagcttgg ataacatga atgagccgta tacaaggaat atgacataca  
653 gtgctggcca caacctctg aaggccatg cctggctg gcatgtgtac aatgaaaat  
654 ttaggcatgc tcagaatggg aaaatatcca tagccttga ggctgattg atagaacctg  
655 cctgcccctt ctccccaaag gacaagagg tggctgagag agttttgaa ttgacattg  
656 gctggctggc tgagccatt ttcggctctg gagattatcc atgggtgatg agggactggc  
657 tgaaccaaag aaacaattt ctcttctt atttactga agatgaaaa aagctaacc  
658 aggttacct tgacttttg gctttagcc attataccac catcttga gactcagaaa  
659 aagaagatcc aataaaatac aatgattacc tagaagtca agaataacc gacatcacgt  
660 ggctcaactc cccagtcag tggcggtg tgcctgggg gttgcgcaa gtgctgaact  
661 ggctgaagt caagtacgga gacctccca tgtacataat atccaatgga atcgatgacg  
662 ggctgcatgc tgaggacgac cagctgaggg tgtattat gcagaattac ataaacgaag  
663 ctctcaaaag ccacatactg gatggtatca atctttgagg atacttctg tattcttga  
664 acgaccgcac agctccgagg ttggcctct atcgttatgc tgcagatcag ttgagccca  
665 aggcacatc gaacattac aggaaaata ttgacagcaa tggttcccg ggccccgaaa  
666 ctctgaaag atttgtcca gaagaattca ccgtgtgtac tgagtgcagt tttttcaca  
667 cccgaaagtc ttactggtc tcatagctt tctatttt tcttctatt atttctct  
668 ccttataat ttactactg aagaaaggca gaagaagta caaatagtc tgaacattt  
669 tctattcatt catttgaaa taattatgca gacacatcag ctgttaacca ttgcacctc  
670 taagtgtgt gaaactgaa atttacata ttgacttct agaaaacatt ttgtggctt  
671 atgacagagg tttgaaatg ggcatagggt atcgtaaaat atgaaataat gcgaatagt  
672 cctgaattg ttcttttt gggtgattaa aaaactgaca ggcactataa ttctgtaac  
673 acactaacia aagcatgaaa aataggaacc acaccaatgc aacatttgc cagaaattg  
674 aatgacaaga ttaggaatat ttcttctgc acccactct aaatttaag ttttctgga  
675 agtagtaatt gcaagagtc gaatagaag ttatgtacca agtaaccatt tctcagctgc  
676 cataataatg cctagtggct tcccctctg caaatctagt ttctatgga aaagaagatg  
677 gcagatacag gagagacgac agagggtcct aggtcggat gttccttctg aaagcaatg  
678 ttctatcaaa tactagtatt aatttatgta tctggttaac gacatactg gagagcaat  
679 tatgaaatg tttatttat atgattttg aggtcctgtc taaacctgt gtcctgagg  
680 gatctgtctc actggcatct tttgagggc ctgacataa ggaaactttt gataagtac  
681 tgcggaaaaa caaacatgaa tctgtgata ttggctctt caggaagcat aaagcaattg  
682 tgaatacag tataccgag tggctctagg tggaggaaa gaggaaaaag tcttattat  
683 gtgcaacatt atgattaatc tgattataca ccattttga gcagatctg gaatgaatga  
684 catgacctt ccctagagaa taaggatgaa ataactactc attctatgaa cagtacact  
685 actttctatt cttagctgt actgtaatt ctttgagtg atagtttac aaattctaa  
686 taggtcaaa agcaatctg tctgaataac actggattg tttctgtat ctctgaggtc

687 tattttatgt ttttgctgct acttctgtgg aagtagcttt gaactagttt tactttgaac  
688 ttccacgctg aaacatgcta gtgatatcta gaaagggcta attaggtctc atcctttaat  
689 gcccttaaa taagctctgc tgatttcag acagggaaagt ctctctatta cactggagct  
690 gttttataga taagcaata ttgtatcagg caagataaac caatgcata acaggcattg  
691 ccaacctcac tgacacaggg tcatagtga taataatata ctgtactata taatatatca  
692 tcttagagg tatgattttt tcatgaaaga taagcttttg gtaatttca ttttaaagtg  
693 gactattaa aattggatgc tagagaatca agtttatttt atgtatata ttttctgatt  
694 ataagagtaa tatatgttca ttgtaaaaat ttttaaaca cagaaactat atgcaaagaa  
695 aaaataaaaa ttatctataa tctcagaacc cagaaatagc cactattaac atttctacg  
696 tttttattt tacatagatc atattgtata tagttagat ctttattaat ttttattg  
697 aaacttctct ttgtcattat tagtcttcaa aagcatgatt ttaaatggt gttgagtatt  
698 ccaccacagg aatgtatcac aactaacccg tcccgttg ttagactagt ttcttattaa  
699 tgttgatgaa tgttgtttaa aaataatttt gttgctacat ttactttaat ttcttgact  
700 gtaaagagaa gtaattttgc tcttgataa agtattatat taataataaa tctgcctgca  
701 acttttgcc ttcttcata atcataaaaa aa  
702

703 The yellow highlighted sequences are identical between the two mouse Klotho mRNA  
704 sequences. This region is Glycosyl hydrolase-1 1 region+. Two sets of ViewRNA® Probes were  
705 used to target 2803-3753 region of canonical mouse Klotho (NM\_013823) and 2585-3597 region  
706 of mouse Klotho 202 (ENSMUST00000202096.1), respectively. These regions were found to be  
707 dissimilar by BLAST, suggesting that each probe set does not bind to the other Klotho mRNA  
708 tested.

709

### 710 ***ImageStream imaging and machine learning-based computational analysis***

711 The flow cytometry for EV imaging was conducted using a 60X objective at a resolution of  
712 0.3  $\mu\text{m}^2/\text{pixel}$ . The reduced width of the core stream using the 60X magnification reduces the  
713 positional space of EVs within the focal plane, thereby increasing the frequency of  
714 microscopically focused objects. Filtered sheath buffers were used to ensure the absence of  
715 particulates. Samples were acquired using INSPIRE® software with the highest resolution  
716 (sensitivity) and lowest speed. All used lasers for fluorochromes employed were used at the  
717 optimal power setting.

718 Machine learning algorithms supported by classical computer vision methods were employed  
719 on the particles to filter EVs and compute most age-discriminative feature. The computer vision  
720 pipeline for filtering operated on the bright-field and side-scatter channels from a database of at  
721 least 20,000 samples (~10,000 each of young and aged serum EVs). Successive steps of image  
722 morphological operations, histogram-based background noise suppression, iso-data thresholding  
723 and h-maxima detection were used to filter spherical and singular EVs that resulted in a final

724 sample set of 13,206 samples. The features used for machine learning algorithms were based on  
725 size (area, aspect ratio), signal strength (intensity) and texture (modulation) of the EVs. Size and  
726 texture features were extracted from the IDEAS software used to analyze the ImageStream based  
727 acquisition of samples. Area and aspect ratio of the EVs indicate how big and circular the EVs  
728 are. The texture feature indicates the smoothness or roughness of the EV. This feature explores  
729 the dispersion of the protein of interest in the EV. This set of features was augmented with signal  
730 strength feature of total intensity, calculated by summing the intensities of all pixels within a  
731 binary mask computed using iso-data thresholding after background noise suppression. A total of  
732 24 features were used to employ the machine learning algorithms on the filtered database.

733 Cross-correlations were computed for exploratory analysis using Spearman's method as the  
734 features were not assumed to be normally distributed. Kernel density estimation was used to  
735 compute the density distributions of the intensity channels associated with CD63, CD81 and  
736 Klotho mRNA markers extracted from young or aged specimens. In this method, a Gaussian  
737 kernel was placed at each data point. The kernel size was computed by Scott's method. The  
738 resulting Gaussian mixture estimates the continuous density of the feature. Total Klotho intensity  
739 was computed as a sum of intensities from channel 4 and channel 11 images since the probes do  
740 not tag same regions of the sequence. Gradient-boosted Decision Trees were used for  
741 classification of age with the above-mentioned curated features as input<sup>3</sup>. Decision tree  
742 classifiers are desirable for their ability to measure the importance of the feature to the  
743 classification task. Accuracy statistics were reported with 20-fold cross-validation to prevent  
744 overfitting.

745

#### 746 *Surface Plasmon Resonance Imaging (SPRi)*

747 Young and aged serum EVs were analyzed by SPRi to study the presence and relative  
748 amount of Klotho protein and CD63 on their membranes. First, gold SPRi chips (Horiba  
749 Scientific SAS, SPRi-Biochip, Palaiseau, France) were functionalized with antibodies against  
750 CD63 (CD63 Antibody, MAB5048, R&D Systems), Klotho (Mouse Klotho Antibody, AF1819,  
751 R&D Systems) and IgG (Purified anti-rat IgG1 Antibody, 407402, Biolegend, as negative  
752 control). The surface of the chip was coated with a self-assembled monolayer of thiolated PEG  
753 molecules for the immobilization of antibodies through EDC/NHS chemistry. Following this, a  
754 microspotter (SPRi Arrayer, Horiba) was used to create spots with diameters of 0.7 mm of the

755 selected antibodies in distinct areas of the same SPRi chip. Four spots per antibody were made at  
756 ~70% relative humidity at room temperature. The chip was then blocked with a solution of  
757 ethanolamine 1 M, pH 9, for 30 min, washed with water and used in SPRi instrument XelPleX  
758 (Horiba Scientific SAS).

759 HBS-ET was used as a running buffer (1.5 M NaCl, 100 mM HEPES, 30 mM EDTA, Tween  
760 0.5%, pH 7.4). EVs were isolated from 100  $\mu$ l of serum by size-exclusion chromatography using  
761 qEV column (IZON, qEVsingle) with PBS as running buffer, collecting fractions from 6th to  
762 11th and adding protease inhibitors. Aliquots of 500  $\mu$ L of young and aged isolated EVs,  
763 resuspended in HBS-ET, were injected in the SPRi flow chamber with a flow rate of 10  $\mu$ L/min  
764 and the SPRi signals were collected and analyzed by using EzSuite software and OriginLab.  
765 Sensorgrams were corrected by subtracting the signal related to the anti-rat IgG antibody.

766

### 767 *Raman Spectroscopy*

768 Young and aged EVs that were isolated by size-exclusion chromatography were concentrated  
769 using an ultracentrifugation step (100,000 g x 70min) for 9th to 11<sup>th</sup> fractions. The concentrated  
770 EVs were analyzed by Raman spectroscopy to obtain an overall biochemical (LabRAM, Horiba  
771 Jobin Yvon S.A.S. Lille, France) following a previous published protocol (Gualerzi A et al, Sci.  
772 Rep, 2017; Gualerzi A et al, JEV, 2019). Briefly, 5 $\mu$ l of the concentrated EV suspension was  
773 applied on calcium fluoride disks and Raman acquisitions were performed using the following  
774 characteristics: (a) 532 nm laser, (b) 50x objective, (c) grating 1800, (d) 400  $\mu$ m entrance slit and  
775 (e) in the spectral ranges 400-1800  $\text{cm}^{-1}$  and 2600-3200  $\text{cm}^{-1}$ . A reference sample (Si) at 570.7  
776  $\text{cm}^{-1}$  was used to calibrate the instrument prior to running the experimental samples. Ten spectra  
777 per sample were collected following a line-map from the border of the drop to the edge, with an  
778 acquisition time of 30 seconds, following which the acquired data were analyzed through  
779 LabSpec6 and OriginLab softwares. First, a despiking (poly 5), baseline correction (fifth order  
780 polynomial curve), normalization by unit vector was performed following which multivariate  
781 statistical analysis was performed on the spectra. Principal Component Analysis (PCA) was  
782 performed for the data reduction identifying the principal components (PCs) that represent the  
783 differences in the spectra. Linear discriminant analysis (LDA) was performed by using a small  
784 number of PCs (n=15) in order to evaluate the possibility to discriminate the spectra of two

785 groups in statistically significant way (Mann-Whitney Test). PCA was performed using  
786 OriginLab PlugIn called "Principal Component Analysis for Spectroscopy".

787

### 788 ***Administration of EVs to aged cells and silencing Klotho mRNA in EVs***

789 Muscle progenitors from aged or *Klotho*<sup>-/-</sup> mice were plated at a density of 10,000 cells per  
790 well in an 8-well chamber slide for 24 hours. The cells were then exposed to one billion young or  
791 aged EVs for a duration of 48 hours.

792 To test whether *Klotho* mRNA may be a driver for *Klotho* modulation within the recipient  
793 aged cells and *Klotho*<sup>-/-</sup> cells, young EVs were treated with non-targeting control scramble or  
794 siRNA to *Klotho* for a total of 50 minutes prior to administering them to aged cells. Every billion  
795 EVs received 10 µl of transfection reagent (Dharmacon, Dharmafect T-2001-01) and 10 µL of a  
796 smart-pool of 5µM non-targeting control (Dharmacon) or siRNA to *Klotho* (Dharmacon). First,  
797 the transfection reagent and scramble/siRNA were mixed and incubated in the incubator at 37C  
798 for 10 minutes. Following incubation, the EVs were placed on ice for 40 minutes prior to use for  
799 an *in vitro* application. Cells receiving the young, aged or treated young EVs were analyzed for  
800 MyoD, cardiolipin content and/or *Klotho* expression 48 hours post-administration.

801

### 802 ***ELISA***

803 Muscle progenitors were plated on an 8 well chamber slide or 12-well plate at a density of  
804 8,000 cells or 20,000 cells per well, respectively, prior to treatment with one or two billion EVs.  
805 Conditioned media from the samples (untreated aged cells/*Klotho*<sup>-/-</sup> cells and aged cells/ *Klotho*<sup>-/-</sup>  
806 cells treated with young EVs) were collected 48 hours after treatment.

807 *Klotho* protein levels in media were measured by a colorimetric sandwich enzyme  
808 immunoassay (ELISA Kit SEH757Mu, Cloud-Clone Corp, Lot#L170622859) according to  
809 manufacturer's instructions. Briefly, 100 µL of standards and samples were added to a 96-well  
810 microtiter plate that was pre-coated with a biotin-conjugated antibody specific to *Klotho*. The  
811 plate was then incubated for one hour at 37°C following which the samples and standards were  
812 removed. A 100 µL of detection reagent A (Biotin-conjugated antibody) was added to each well  
813 and incubated at 37°C for one hour. The plates were washed three times with washing buffer  
814 provided by the manufacturer. Next, 100 µL of detection reagent B (Avidin conjugated  
815 Horseradish-Peroxidase (HRP-avidin)) was added to each well and incubated for 30 minutes at

816 37 °C. The plate was then washed with washing buffer five times. Next, 90µL of  
817 tetramethylbenzidine substrate was added to the plate and incubated at 37 °C for 20 minutes. A  
818 50 µL sulfuric acid stop solution was then added to terminate the color development reaction.  
819 The optical density (OD) of each well was measured at 450 nm. The OD of samples was  
820 compared to OD standard curve with known antigen concentrations to determine the  
821 concentration of samples. The standard curve had a concentration range from 3.25 pg/mL to 200  
822 pg/mL. The data were then normalized to the number of cells per well. Samples were never  
823 subjected to freeze-thaw.

824

### 825 *EV engineering with synthetic mRNA*

826 Aged or Klotho<sup>+/-</sup> EVs isolated from the serum were transfected with the synthetic Klotho  
827 mRNA sequences using Exo-Fect™ exosome transfection reagent from System Biosciences  
828 (Cat#EXFT-10A1). Briefly, one billion EVs were treated with 10 µL exofect solution and 1 µg  
829 of synthetic Klotho mRNA. The unloaded control EVs were treated with just 10 µL exofect  
830 solution. This solution was mixed well by flicking the tube 3 times. Samples were incubated at  
831 37°C for 10 minutes. A stopping solution (30 µL) provided in the kit was added to the samples  
832 and incubated on ice for 30 minutes to precipitate the EVs. Samples were then centrifuged at  
833 16,100 g at 4°C. The supernatants were removed, and samples were re-suspended in culture  
834 media (DMEM+20% exosome-free FBS+1% penicillin/streptomycin) and administered to 10,000  
835 aged muscle progenitors for 48 hours. The synthetic mRNA used was the Klotho mRNA with  
836 RNA length of 3321 NT. The sequence was substituted 25% with Cyanine 5-U and capped  
837 (Cap1) using CleanCap™ AG (Trilink Biotechnologies, Lot no. WOTL25007). The opening  
838 reading frame used in constructing the synthetic mRNA is:

```
839 ATGCTAGCCCGCGCCCCTCCTCGCCGCCCGCCGCGGCTGGTGCTGCTCCGTTTGCTGTTG  
840 CTGCATCTGCTGCTGCTCGCCCTGCGCGCCCCGCTGCCTGAGCGCTGAGCCGGGTCAGGGC  
841 GCGCAGACCTGGGCTCGCTTCGCGCGCGCTCCTGCCCCAGAGGCCGCTGGCCTCCTCCAC  
842 GACACCTTCCCCGACGGTTTCCTCTGGGCGGTAGGCAGCGCCGCCTATCAGACCGAGGGC  
843 GGCTGGCGACAGCACGGCAAAGGCGCGTCCATCTGGGACACTTTCACCCATCACTCTGGG  
844 GCGGCCCCGTCGACTCCCCGATCGTCGTGGCGCCGTCGGGTGCCCCGTCGCCTCCCCTG  
845 TCCTCCACTGGAGATGTGGCCAGCGATAGTTACAACAACGTCTACCGCGACACAGAGGGG  
846 CTGCGCGAACTGGGGGTCACCCACTACCGCTTCTCCATATCGTGCGCGGGTGTCCCC  
847 AATGGCACCGCGGGCACTCCCAACCGCGAGGGGCTGCGCTACTACCGGCGGCTGCTGGAG  
848 CGGCTGCGGGAGCTGGGCGTGCAGCCGGTGGTTACCCTGTACCATTGGGACCTGCCACAG  
849 CGCCTGCAGGACACCTATGGCGGATGGGCCAATCGCGCCCTGGCCGACCATTTCAGGGAT  
850 TATGCCGAGCTCTGCTTCCGCCACTTCGGTGGTCAGGTCAAGTACTGGATCACCATTGAC  
851 AACCCCTACGTGGTGGCCTGGCACGGGTATGCCACCGGGCGCCTGGCCCCGGGCGTGAGG  
852 GGCAGCTCCAGGCTCGGGTACCTGGTTGCCACAACCTACTTTTGGTCCATGCCAAAGTC
```

853 TGGCATCTCTACAACACCTCTTTCCGCCCCACACAGGGAGGCCGGGTGTCTATCGCCTTA  
854 AGCTCCCATTGGATCAATCCTCGAAGAATGACTGACTATAATATCAGAGAATGCCAGAAG  
855 TCTCTTGACTTTGTGCTAGGCTGGTTTGCCAAACCCATATTTATTGATGGCGACTACCCA  
856 GAGAGTATGAAGAACAACCTCTCGTCTCTTCTGCCTGATTTTACTGAATCTGAGAAGAGG  
857 CTCATCAGAGGAACTGCTGACTTTTTTGTCTCTCCTTCGGACCAACCTTGAGCTTTCAG  
858 CTATTGGACCCTAACATGAAGTTCGCCAATTGGAGTCTCCCAACCTGAGGCAGCTTCTG  
859 TCTTGGATAGATCTGGAATATAACCACCCTCCAATATTTATTGTGGAAAATGGCTGGTTT  
860 GTCTCGGGAACCACAAAAGGGATGATGCCAAATATATGTATTATCTCAAGAAGTTCATA  
861 ATGGAAACCTTAAAAGCAATCAGACTGGATGGGGTCGACGTCATTGGGTACACCGCGTGG  
862 TCGCTCATGGACGGTTTCGAGTGGCATAGGGGCTACAGCATCCGGCGAGGACTCTTCTAC  
863 GTTGACTTTCTGAGTCAGGACAAGGAGCTGTTGCCAAAGTCTTCGGCCTTGTCTACCAA  
864 AAGCTGATAGAGGACAATGGCTTTCCTCCTTTACCTGAAAACCAGCCCCTTGAAGGGACA  
865 TTTCCCTGTGACTTTGCTTGGGGAGTTGTTGACAACACTACGTTCAAGTGGACACTACTCTC  
866 TCTCAGTTTACTGACCCGAATGTCTATCTGTGGGATGTGCATCACAGTAAGAGGCTTATT  
867 AAAGTAGACGGGTTGTAGCCAAGAAGAAAACCTTACTGTGTTGATTTCTCTGCCATC  
868 CGGCCTCAGATAACCTTACTTCGAGAAATGCGGGTCACCCACTTTCGCTTCTCCCTGGAC  
869 TGGGCCCTGATCTTGCCTCTGGGTAACCAGACCCAAGTGAACCACACGGTTCTGCACTTC  
870 TACCGCTGCATGATCAGCGAGCTGGTGCACGCCAACATCACTCCAGTGGTGGCCCTGTGG  
871 CAGCCAGCAGCCCCGCACCAAGGCCTGCCACATGCCCTTGCAAAACATGGGGCCTGGGAG  
872 AACCCGCACACTGCTCTGGCGTTTGCAGACTACGCAAACCTGTGTTTTAAAGAGTTGGGT  
873 CACTGGGTCAATCTCTGGATCACCATGAACGAGCCAAACACACGGAACATGACCTATCGT  
874 GCCGGGCACCACCTCCTGAGAGCCCATGCCTTGGCTTGGCATCTGTACGATGACAAGTTT  
875 AGGGCGGCTCAGAAAGGCAAAATATCCATCGCCTTGCAGGCTGACTGGATAGAACCGGCC  
876 TGCCCTTTCTCTCAAAATGACAAAGAAGTGGCCGAGAGAGTTTTGGAATTTGATATAGGC  
877 TGGCTGGCAGAGCCTATTTTTGGTTCGGGAGATTATCCACGTGTGATGAGGGACTGGCTG  
878 AACCAAAAAACAATTTTCTTTTGCCTATTTACCCGAAGATGAAAAAAGCTAGTCCGG  
879 GGTTCCTTTGACTTCTGGCGGTGAGTCATTACACCACCATTCTGGTAGACTGGGAAAAG  
880 GAGGATCCGATGAAATACAACGATTACTTGGAGGTACAGGAGATGACTGACATCACATGG  
881 CTCAACTCTCCAGTCAGGTGGCAGTGGTGCCTTGGGGGCTGCGCAAAGTGCTCAACTGG  
882 CTAAGTTCAAGTACGGAGACCTCCCGATGTATGTGACAGCCAATGGAATCGATGATGAC  
883 CCCACGCCGAGCAAGACTCACTGAGGATCTATTATATTAAGAATTATGTGAATGAGGCT  
884 CTGAAAGCCTACGTGTTGGACGACATCAACCTTTGTGGCTACTTTGCGTATTCACTTAGT  
885 GATCGCTCAGTCCCAAGTCTGGCTTTTATCGATATGCTGCGAATCAGTTTGAGCCCAAA  
886 CCATCTATGAAACATTACAGGAAAATTATTGACAGCAATGGCTTCTGGGTTCTGGAACA  
887 CTGGGAAGGTTTTGTCCAGAAGAATACTGTGTGCACCGAATGTGGATTTTTTCAAACC  
888 CGGAAGTCTTTGCTGGTCTTCATCTCGTTTCTGTTTTACTTTTATTATTTCTCTTGCT  
889 CTCATTTTTCACTACTCCAAGAAAGGCCAGAGAAGTTATAAGTAA

890

891

## 892 **References**

- 893 1 Sahu, A. *et al.* Age-related declines in alpha-Klotho drive progenitor cell mitochondrial  
894 dysfunction and impaired muscle regeneration. *Nat Commun* **9**, 4859, doi:10.1038/s41467-018-  
895 07253-3 (2018).
- 896 2 Yi, L. & Rossi, F. Purification of progenitors from skeletal muscle. *J Vis Exp*, doi:10.3791/2476  
897 (2011).
- 898 3 Kuo, D. E. *et al.* Gradient Boosted Decision Tree Classification of Endophthalmitis Versus Uveitis  
899 and Lymphoma from Aqueous and Vitreous IL-6 and IL-10 Levels. *J Ocul Pharmacol Ther* **33**, 319-  
900 324, doi:10.1089/jop.2016.0132 (2017).

901
